# Supplementary material for: Synthesis and anticancer properties of dendritic glycoconjugates containing multiple o-carborane clusters
Source: Royal Society of Chemistry journal article supplement (doi:10.1039/d3nj00182b), 2023-01-01
Supplement: d3nj00182b1.pdf [file d3nj00182b1.pdf]

# Supplementary Information

## Synthesis and anticancer properties of dendritic glycoconjugates containing multiple *o*-carborane clusters

Biswa Ranjan Swain,<sup>a,b</sup> Soumya Ranjan Jena,<sup>c</sup> Swaraj Kumar Beriha,<sup>b</sup> Chandra Sekhara Mahanta,<sup>a</sup> Bibhuti Bhusan Jena,<sup>a</sup> Thumpati Prasanth,<sup>d</sup> Luna Samanta,<sup>c</sup> Rashmirekha Satapathy,<sup>\*a</sup> Barada P. Dash<sup>\*b</sup>

<sup>a</sup>Department of Chemistry, Ravenshaw University, Cuttack, Odisha 753 003, India

<sup>b</sup>Department of Chemistry, Siksha 'O' Anusandhan (Deemed to be University) Bhubaneswar, Odisha, 751 030, India

<sup>c</sup>Department of Zoology, Ravenshaw University, Cuttack, Odisha 753 003, India

<sup>d</sup>School of Chemical Sciences, Indian Association for the Cultivation of Science, Jadavpur, Kolkata 700032, India

E-mail: [barada.dash@gmail.com](mailto:barada.dash@gmail.com), [baradadash@soa.ac.in](mailto:baradadash@soa.ac.in) (BD); [rashmi.satapathy@gmail.com](mailto:rashmi.satapathy@gmail.com) (RS)

### Table of Contents

|                                                                                                                            |      |
|----------------------------------------------------------------------------------------------------------------------------|------|
| <sup>1</sup> H, <sup>13</sup> C and <sup>11</sup> B NMR spectra for synthesized compounds ( <b>Figure S1 to S41</b> )..... | S-2  |
| Mass spectra of synthesized compounds ( <b>Figure S42 to S55</b> ).....                                                    | S-23 |

## NMR Spectra of Synthesized Compounds

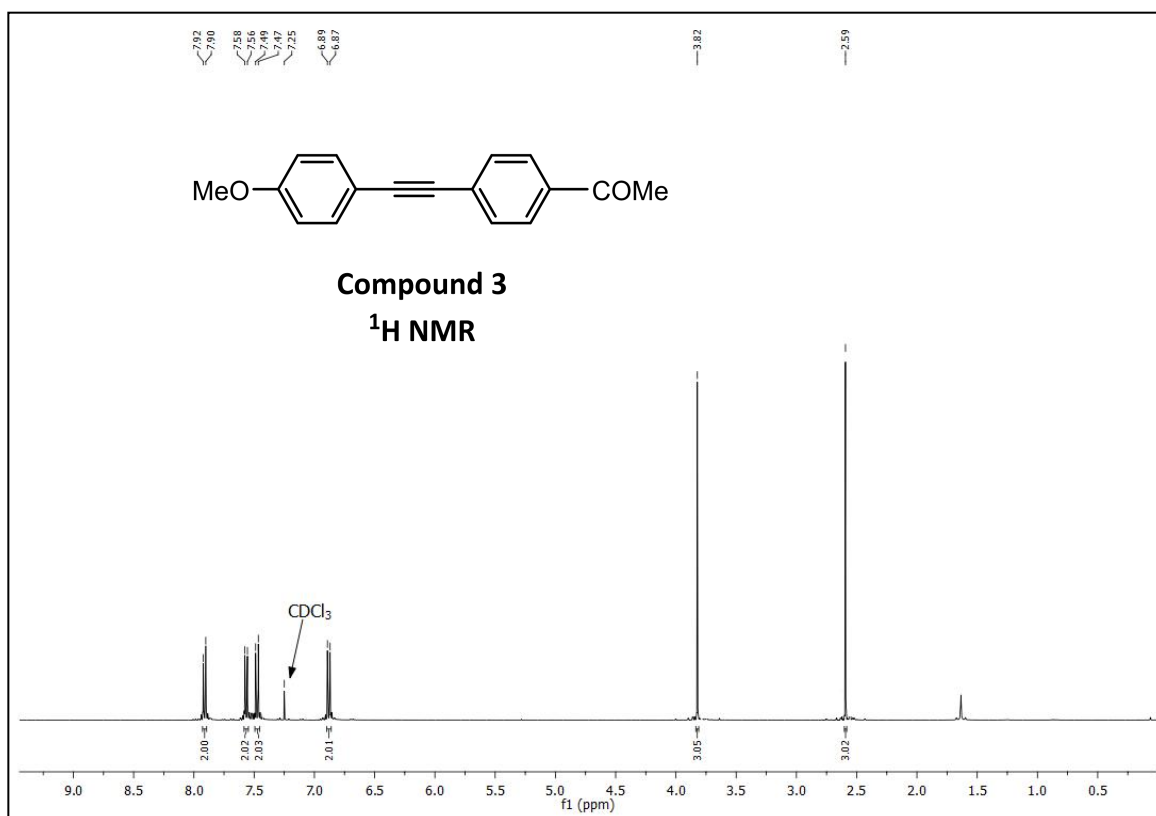

**Figure S1:** <sup>1</sup>H NMR spectra of compound 3 (400 MHz, CDCl<sub>3</sub>)

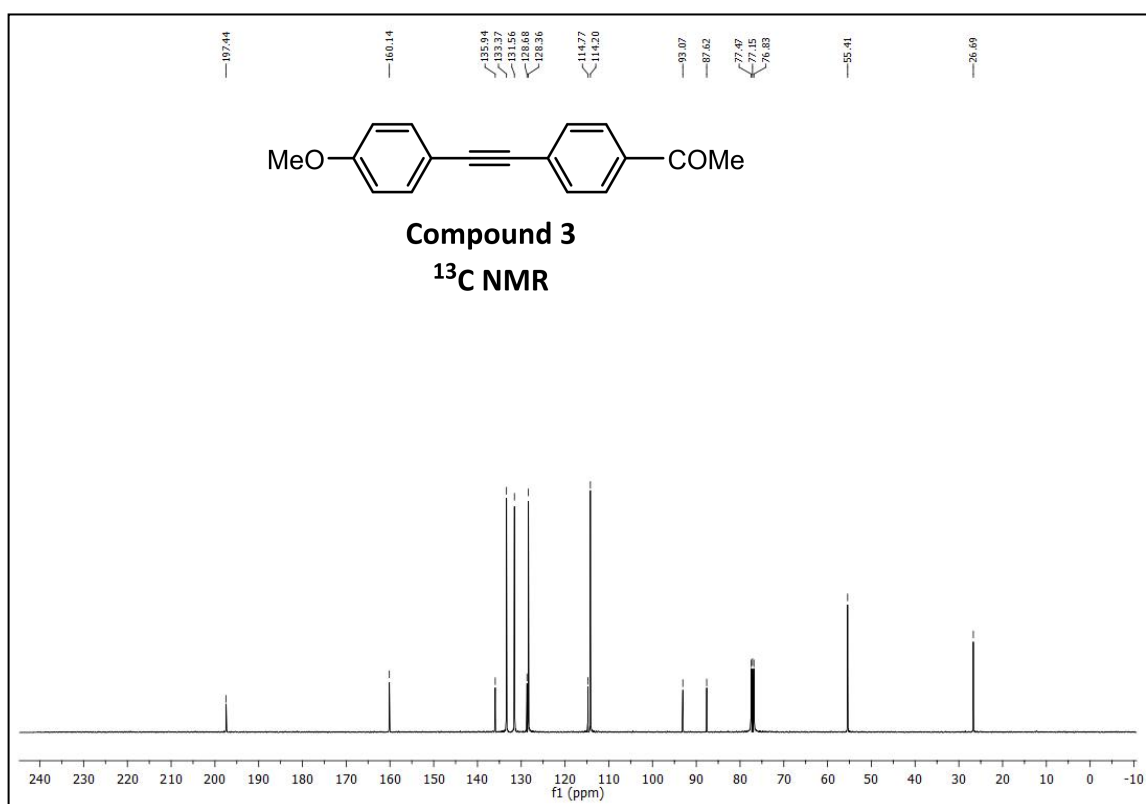

**Figure S2:** <sup>13</sup>C NMR spectra of compound 3 (100 MHz, CDCl<sub>3</sub>)

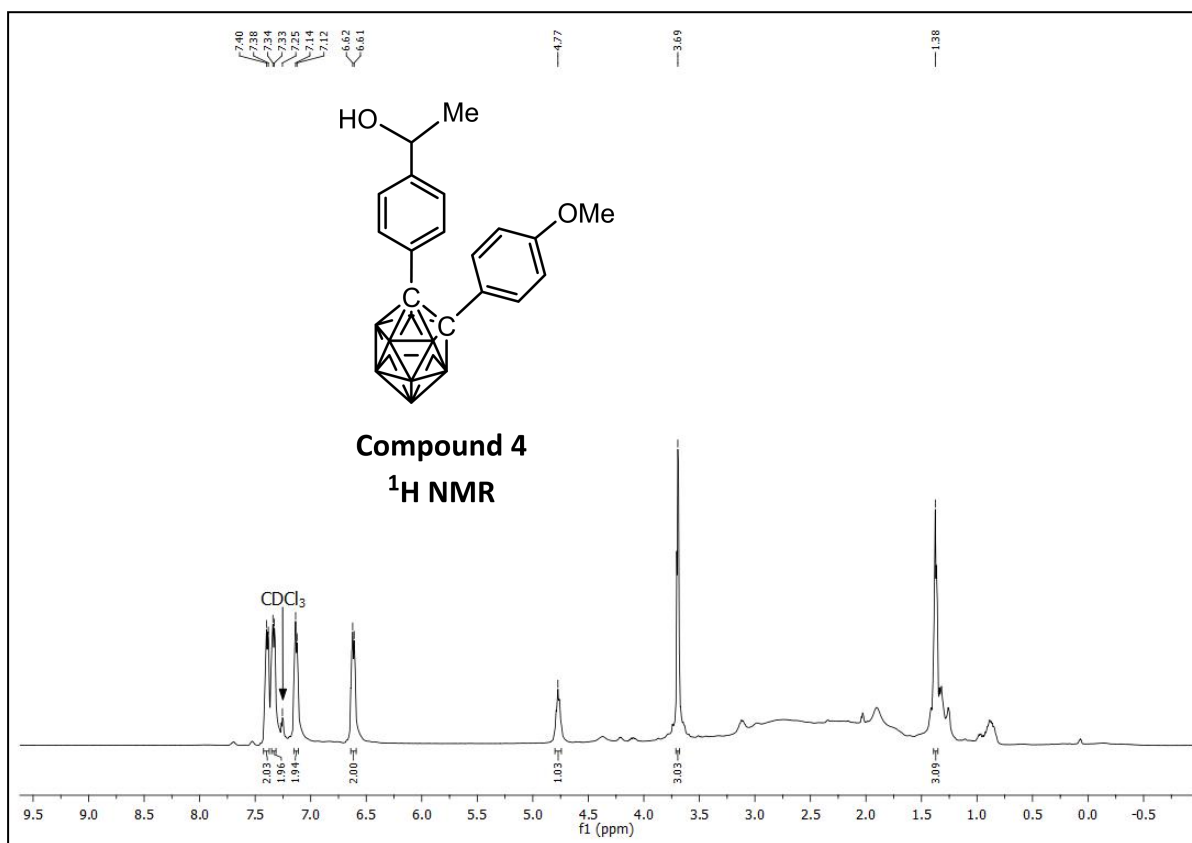

**Figure S3:** <sup>1</sup>H NMR spectra of compound **4** (400 MHz, CDCl<sub>3</sub>)

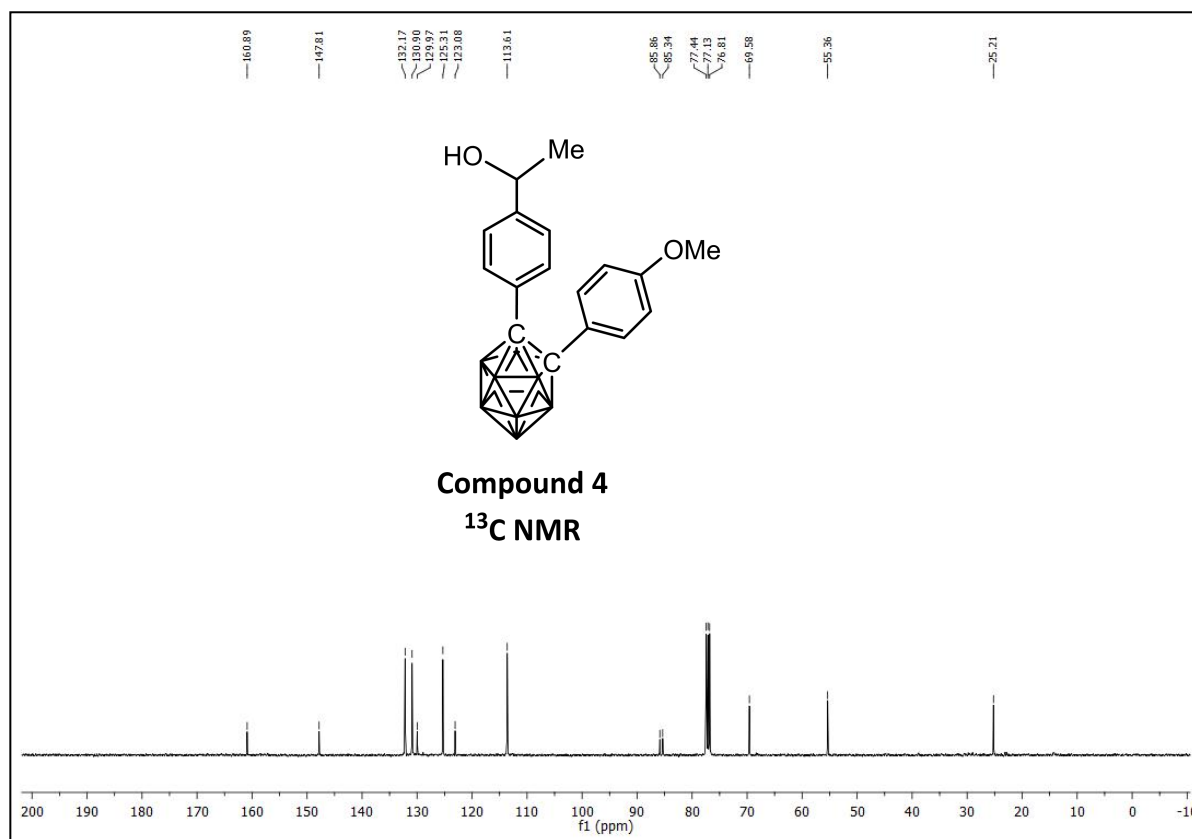

**Figure S4:** <sup>13</sup>C NMR spectra of compound **4** (100 MHz, CDCl<sub>3</sub>)

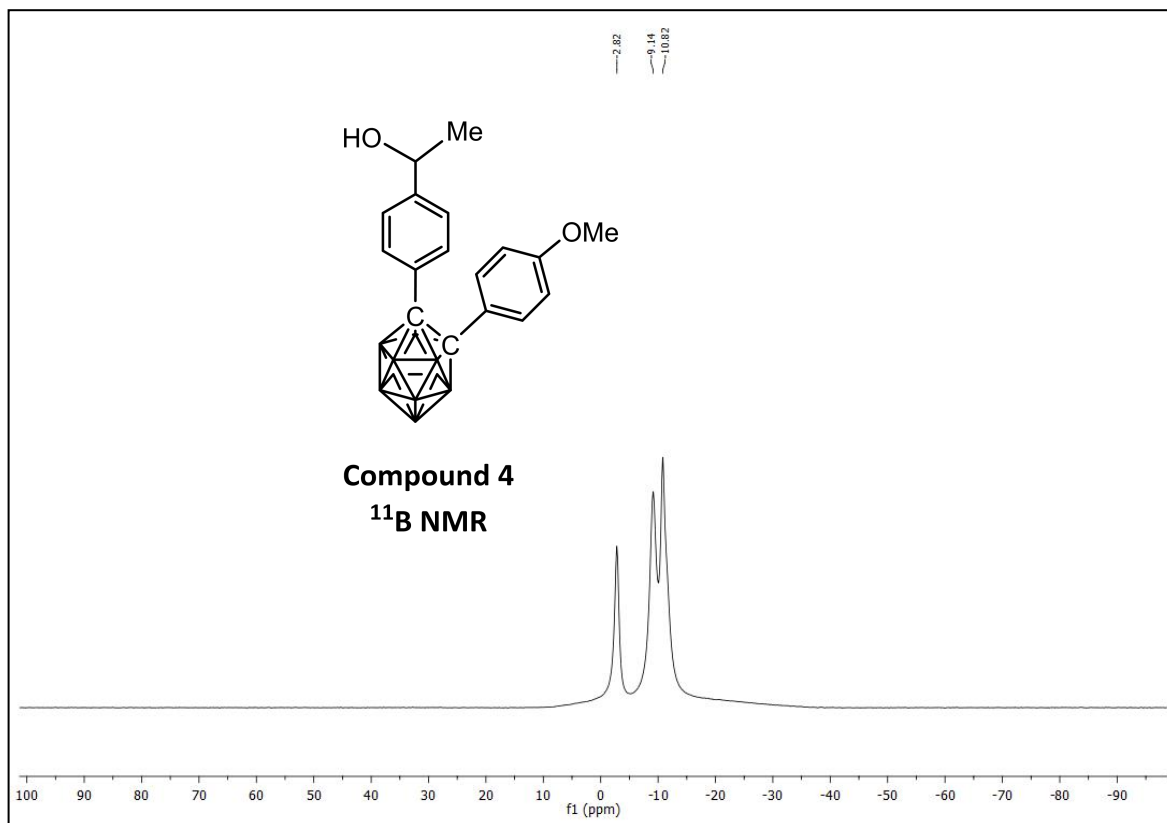

**Figure S5:** <sup>11</sup>B NMR spectra of compound **4** (128 MHz, CDCl<sub>3</sub>)

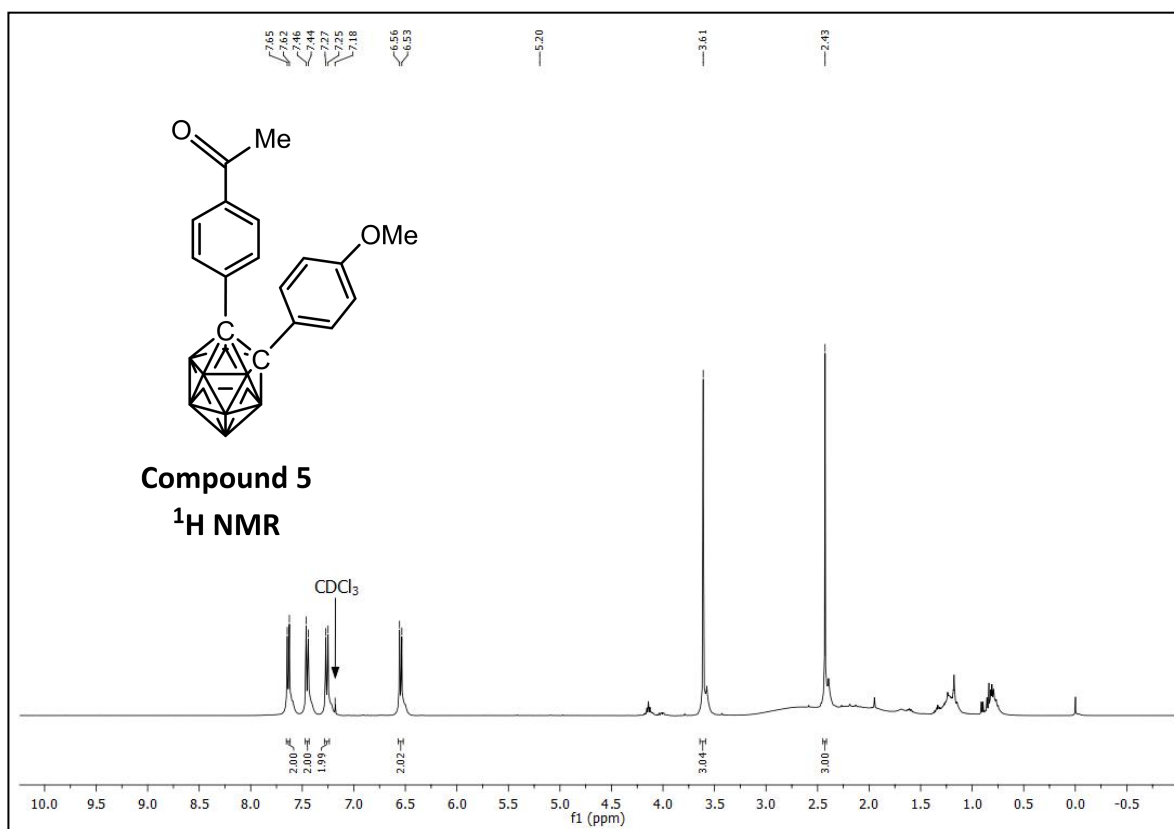

**Figure S6:** <sup>1</sup>H NMR spectra of compound **5** (400 MHz, CDCl<sub>3</sub>)

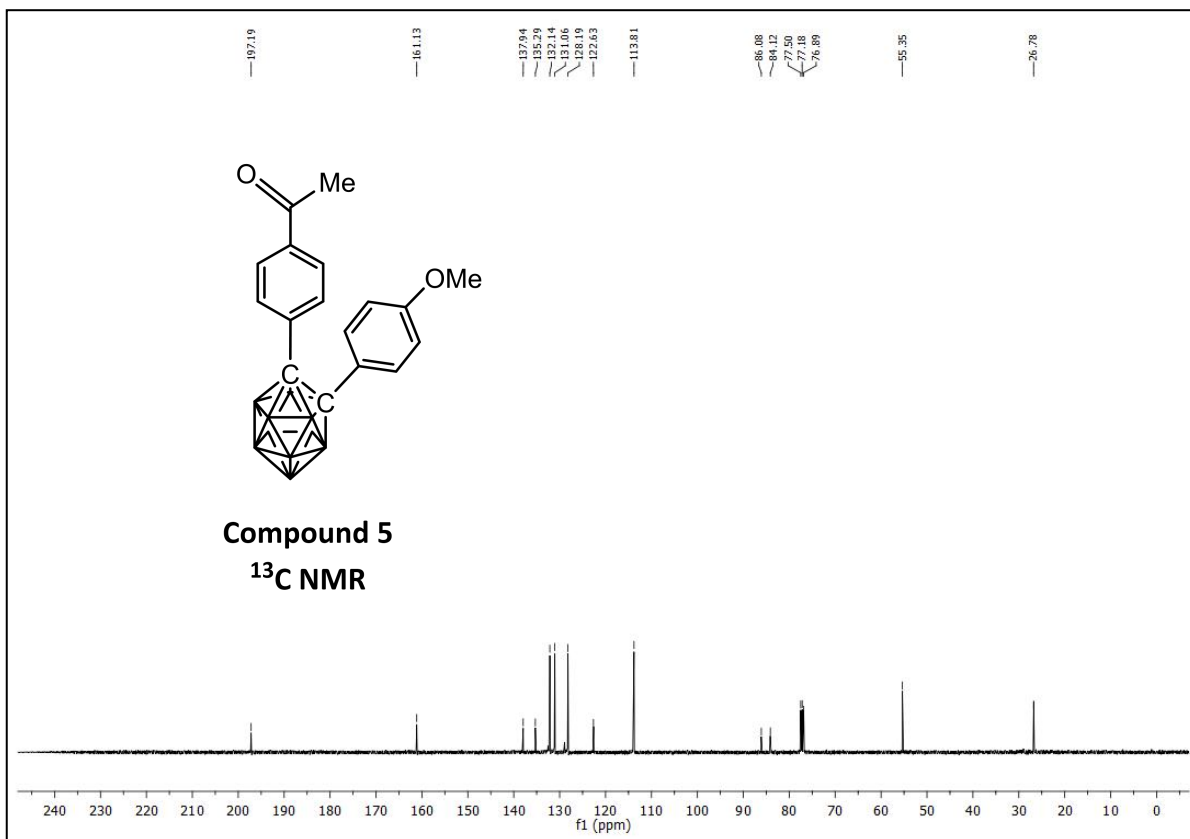

**Figure S7:** <sup>13</sup>C NMR spectra of compound **5** (100 MHz, CDCl<sub>3</sub>)

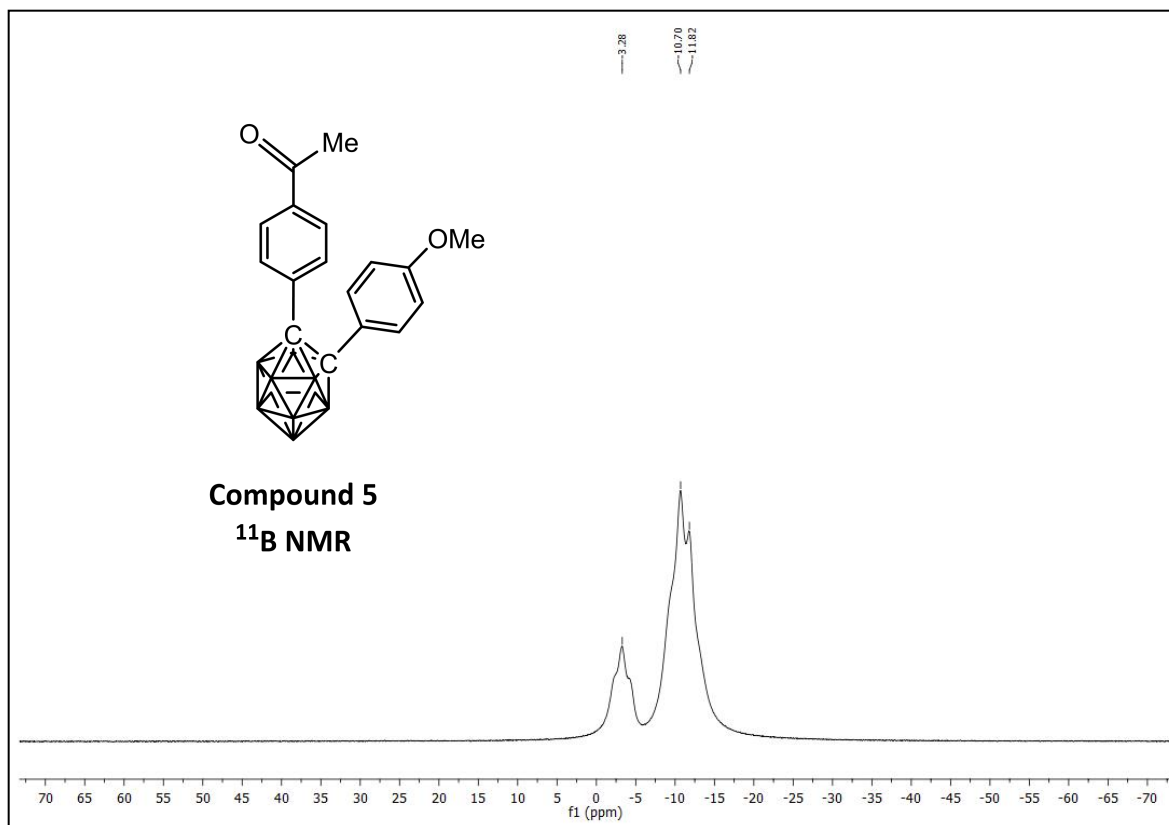

**Figure S8:** <sup>11</sup>B NMR spectra of compound **5** (128 MHz, CDCl<sub>3</sub>)

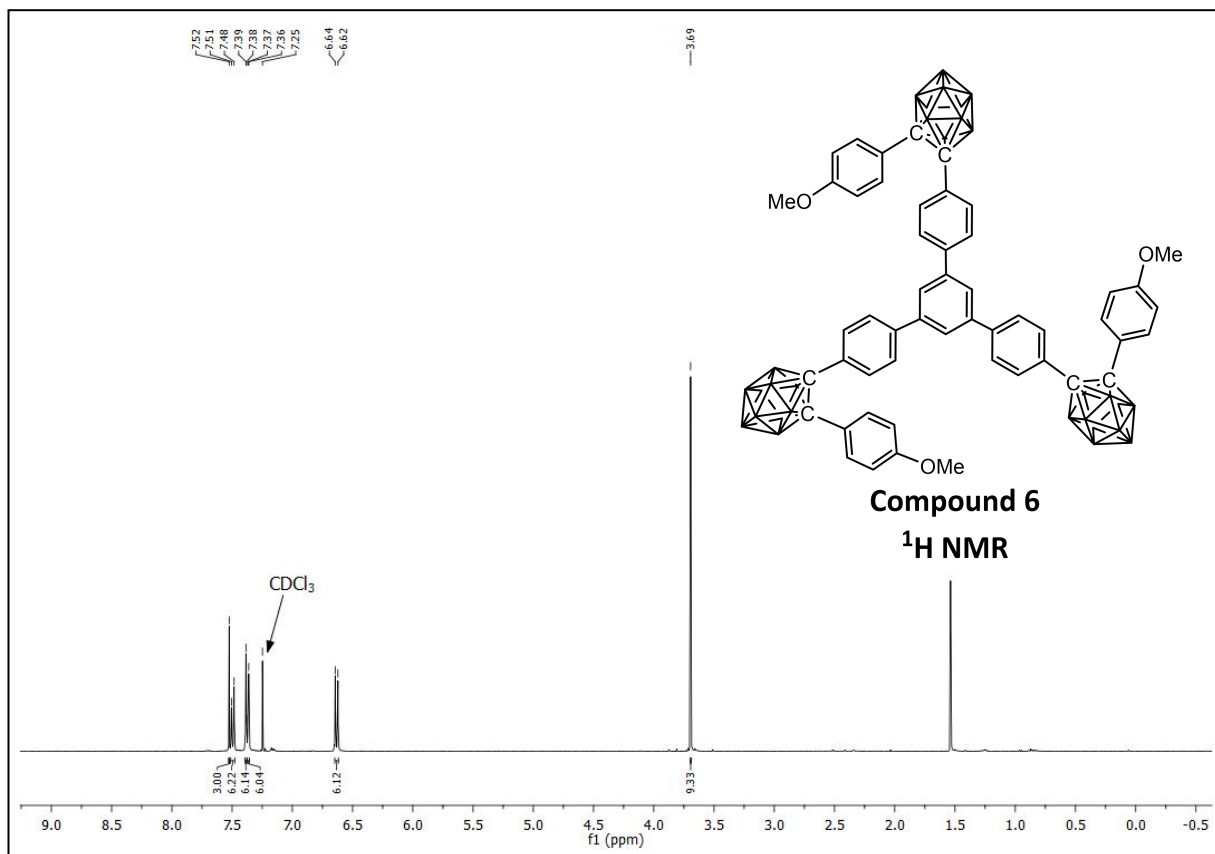

**Figure S9:** <sup>1</sup>H NMR spectra of compound **6** (400 MHz, CDCl<sub>3</sub>)

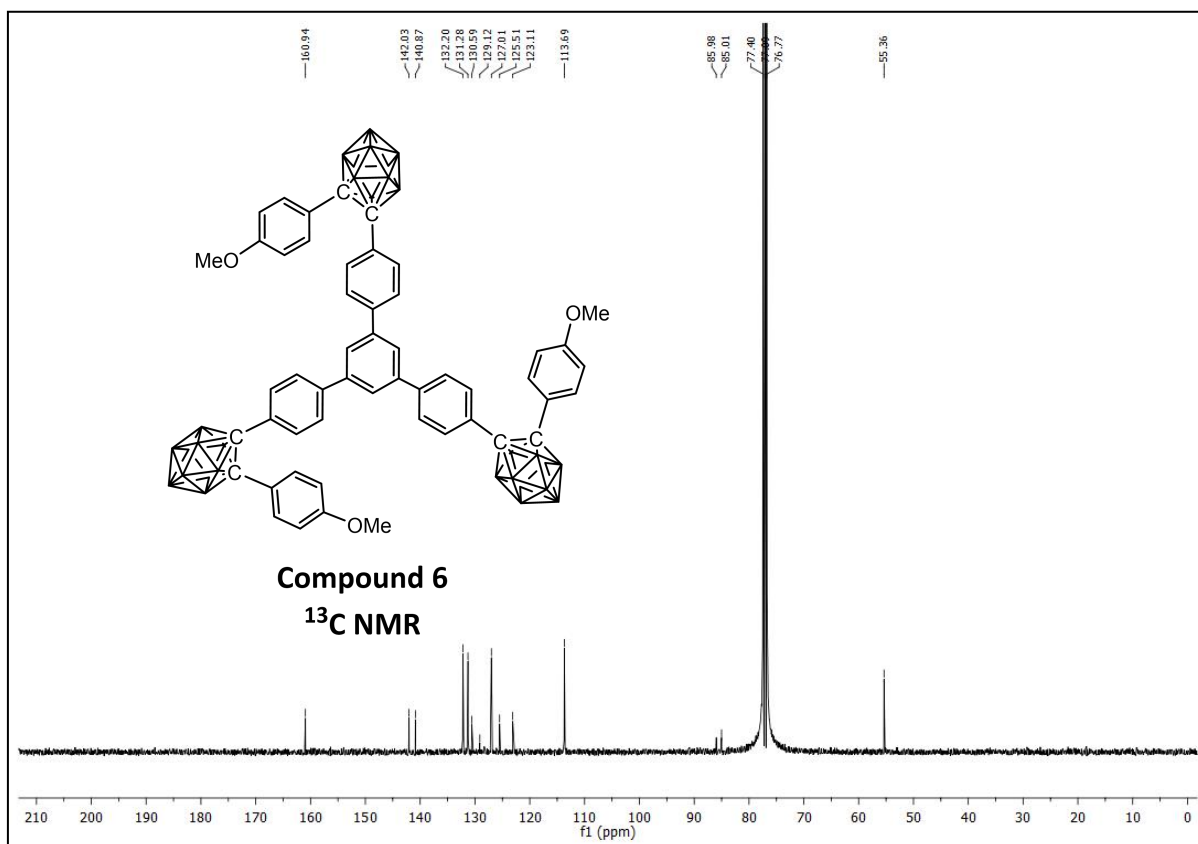

**Figure S10:** <sup>13</sup>C NMR spectra of compound **6** (100 MHz, CDCl<sub>3</sub>)

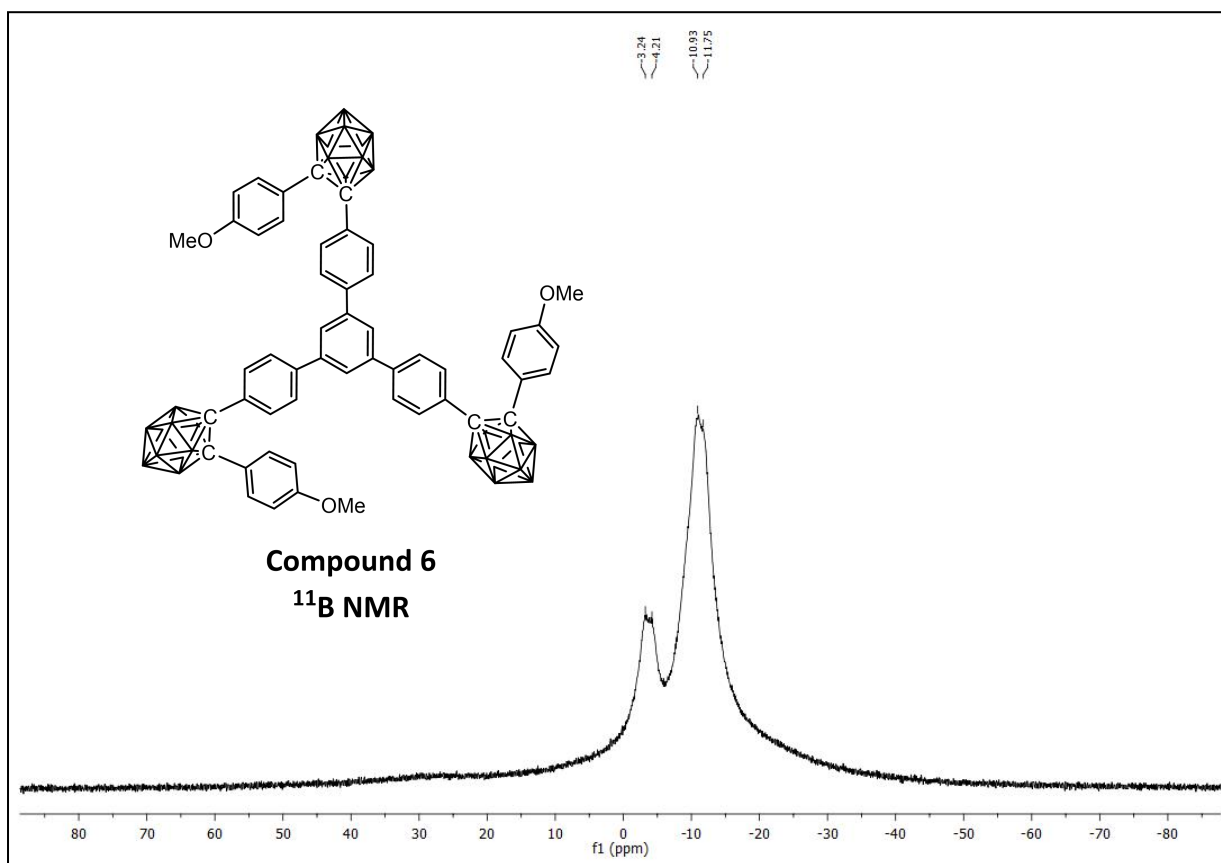

Figure S11:  $^{11}\text{B}$  NMR spectra of compound 6 (128 MHz,  $\text{CDCl}_3$ )

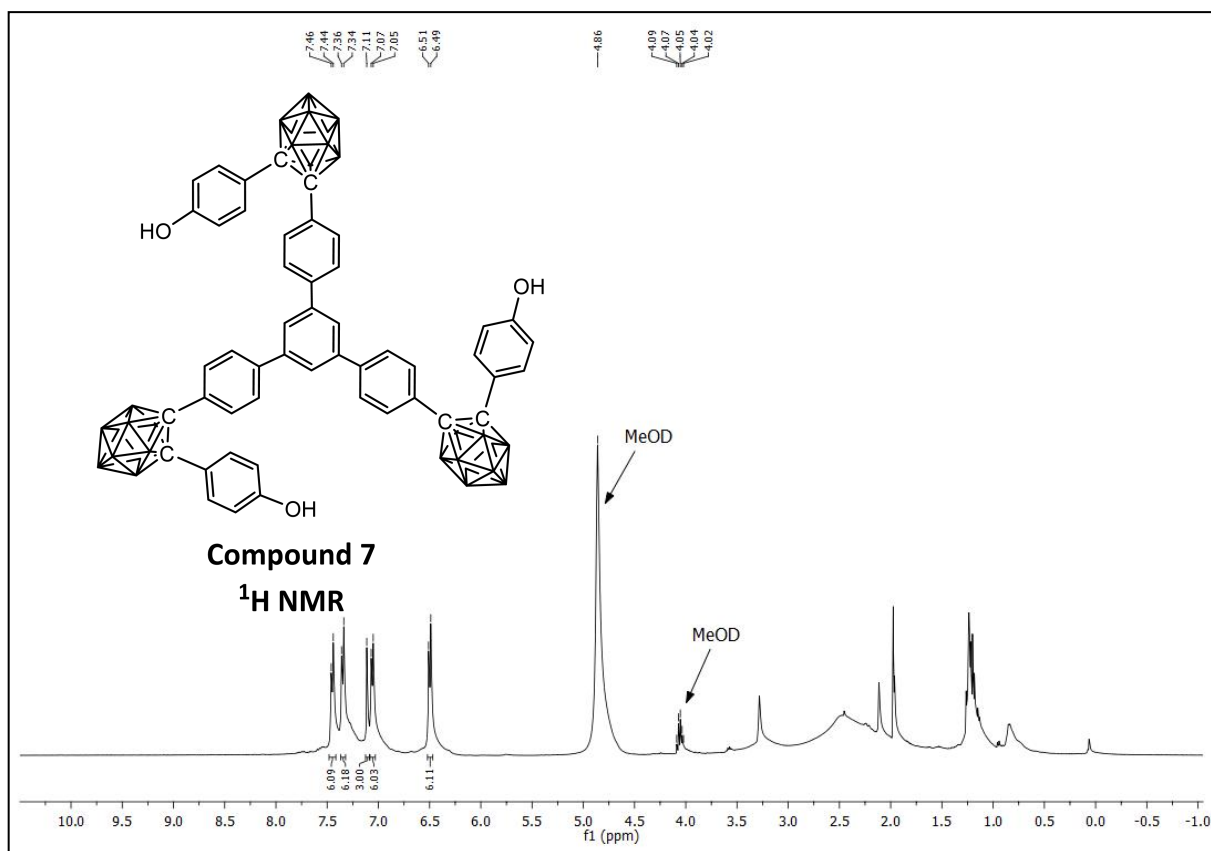

Figure S12:  $^1\text{H}$  NMR spectra of compound 7 (400 MHz,  $\text{CD}_3\text{OD}$ )

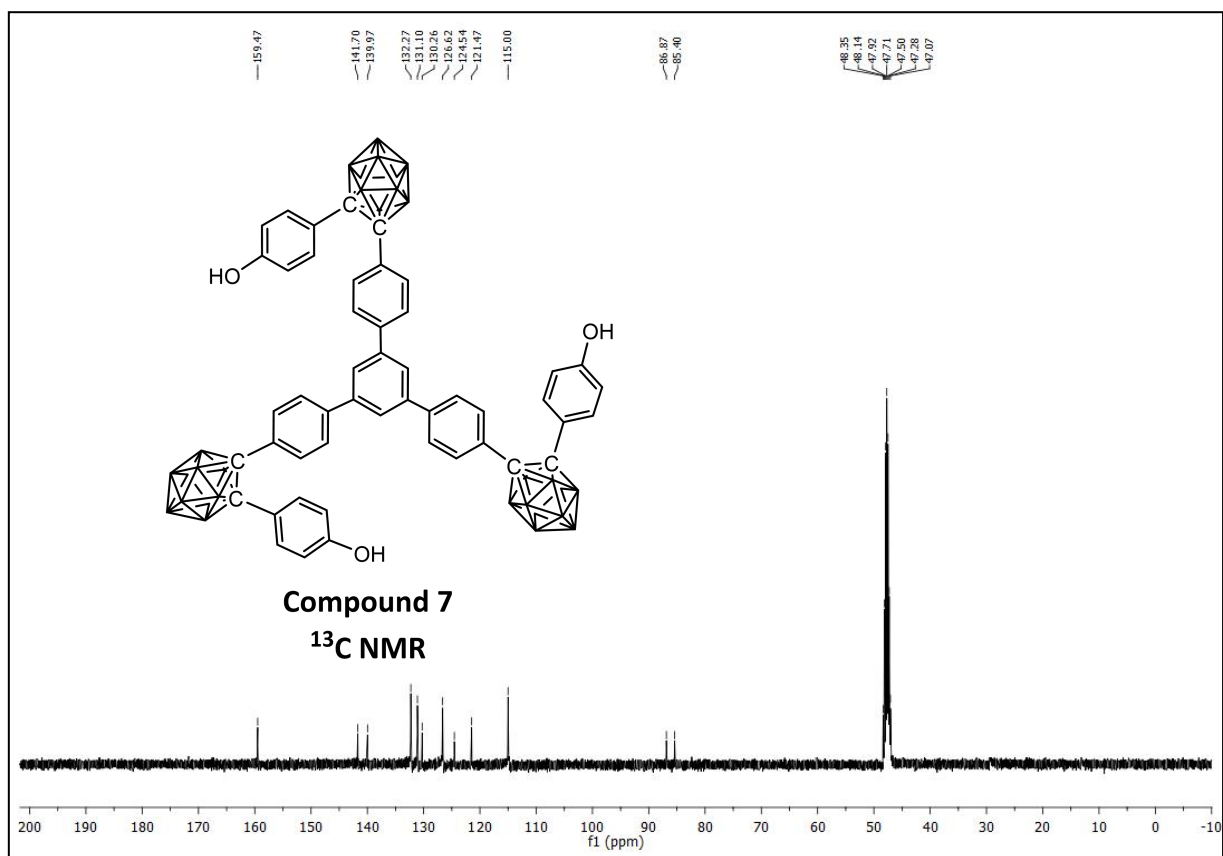

**Figure S13:** <sup>13</sup>C NMR spectra of compound 7 (100 MHz, CD<sub>3</sub>OD)

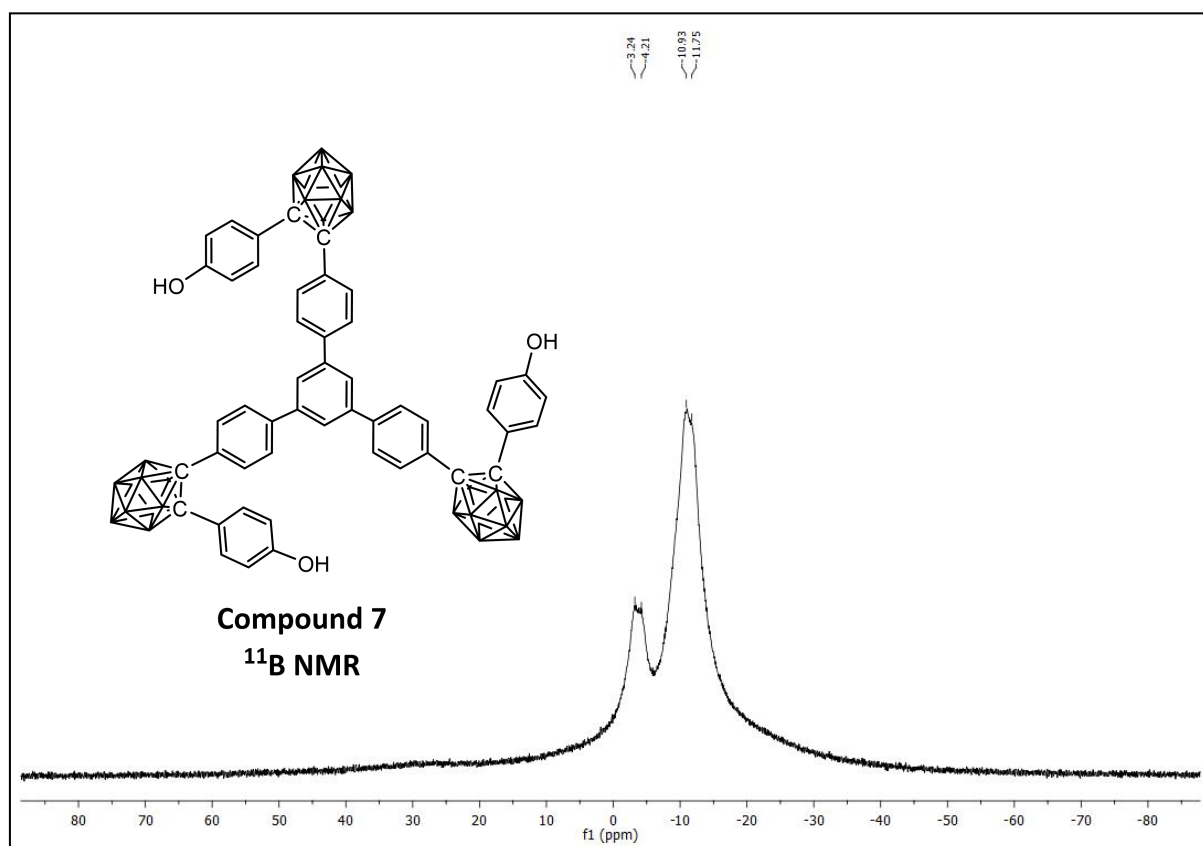

**Figure S14:** <sup>11</sup>B NMR spectra of compound 7 (128 MHz, CD<sub>3</sub>OD)



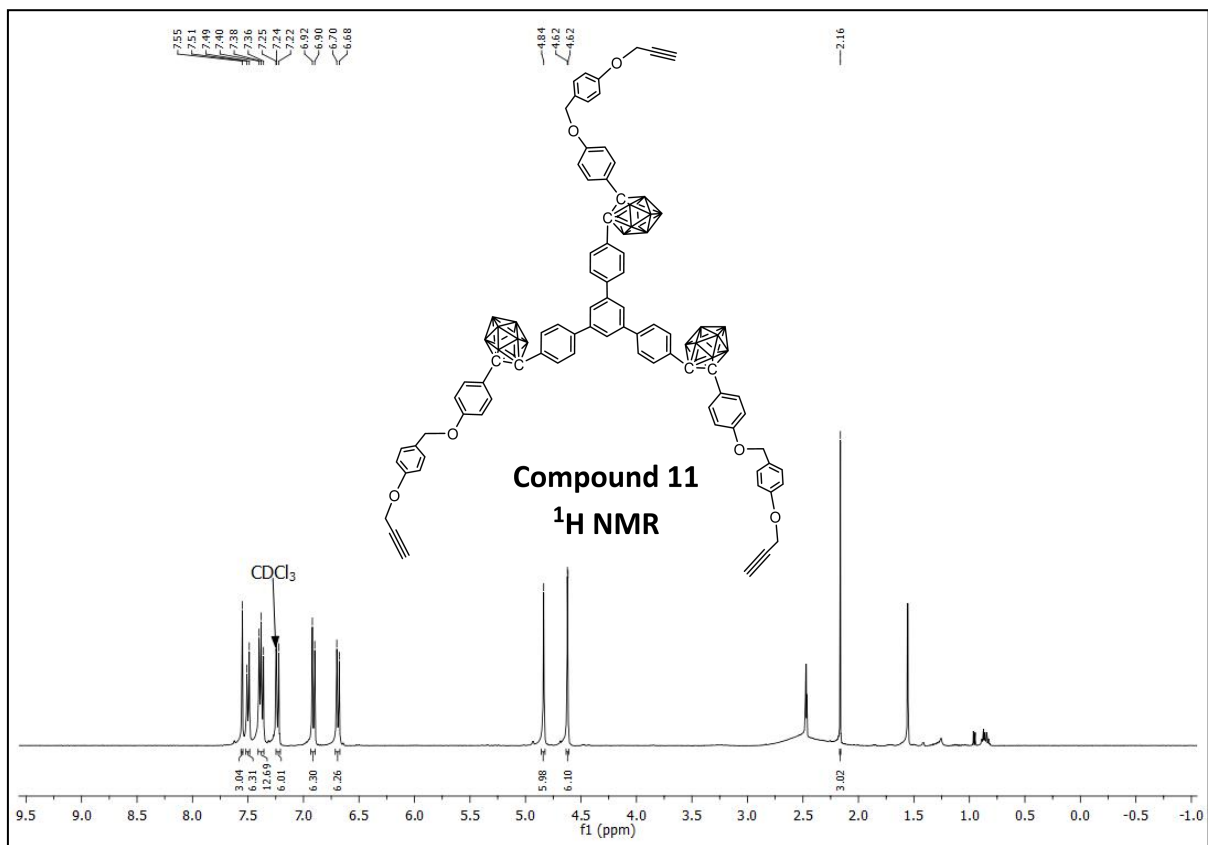

**Figure S15:** <sup>1</sup>H NMR spectra of compound **11** (400 MHz, CDCl<sub>3</sub>)

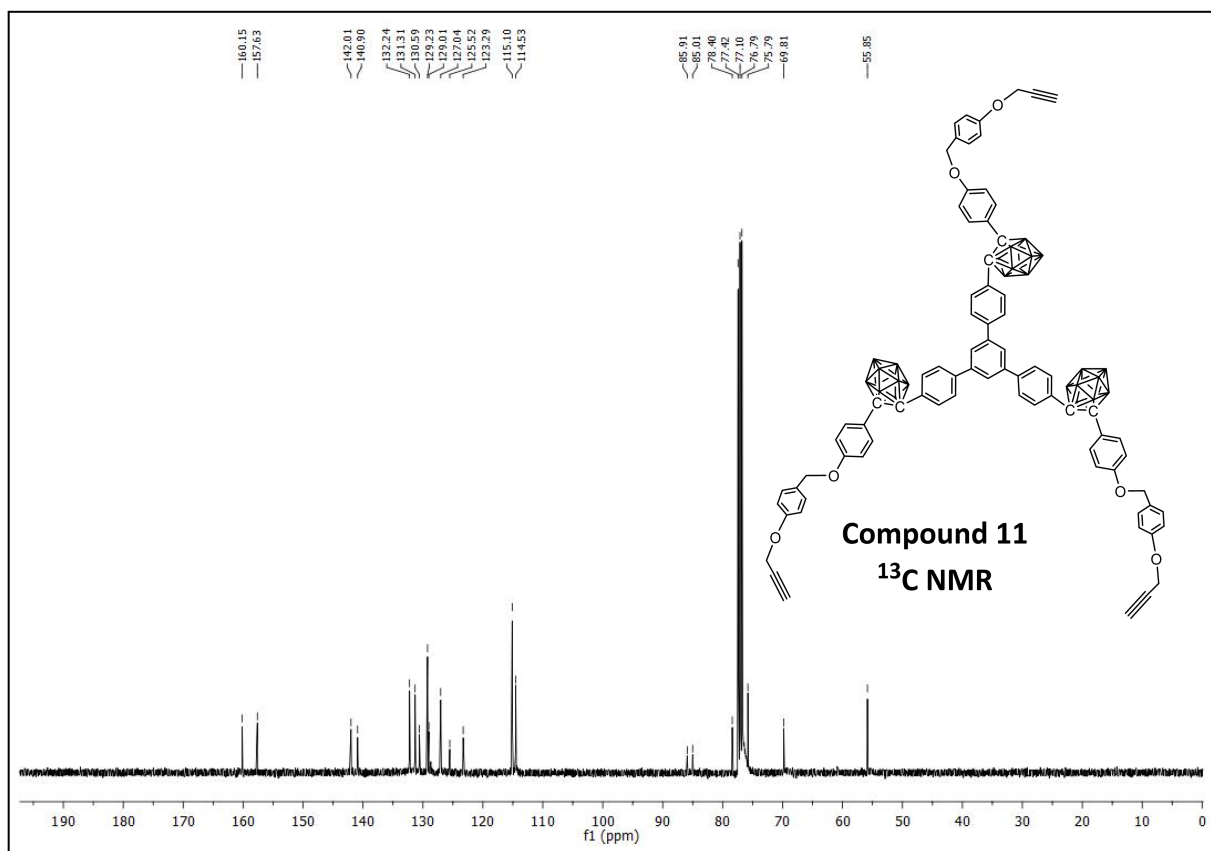

**Figure S16:** <sup>13</sup>C NMR spectra of compound **11** (100 MHz, CDCl<sub>3</sub>)

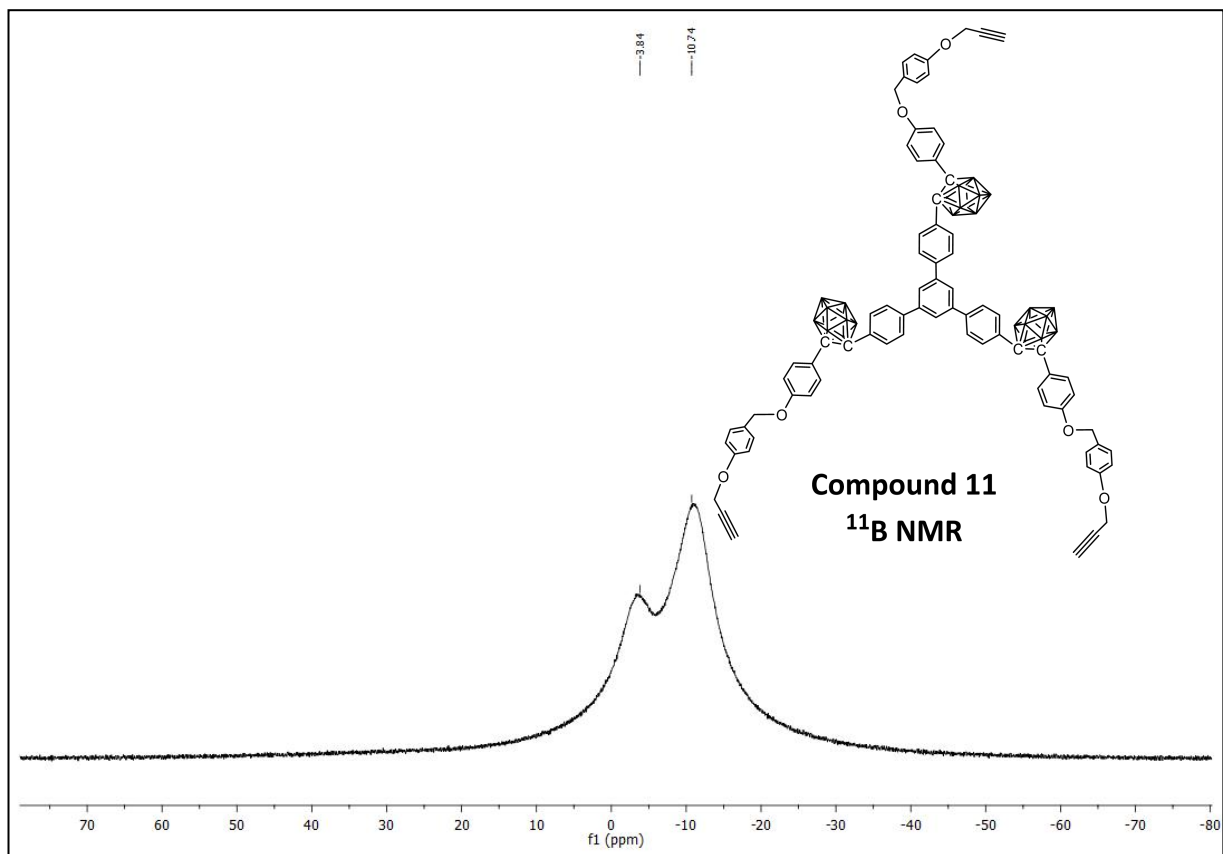

**Figure S16:** <sup>11</sup>B NMR spectra of compound **11** (128 MHz, CDCl<sub>3</sub>)

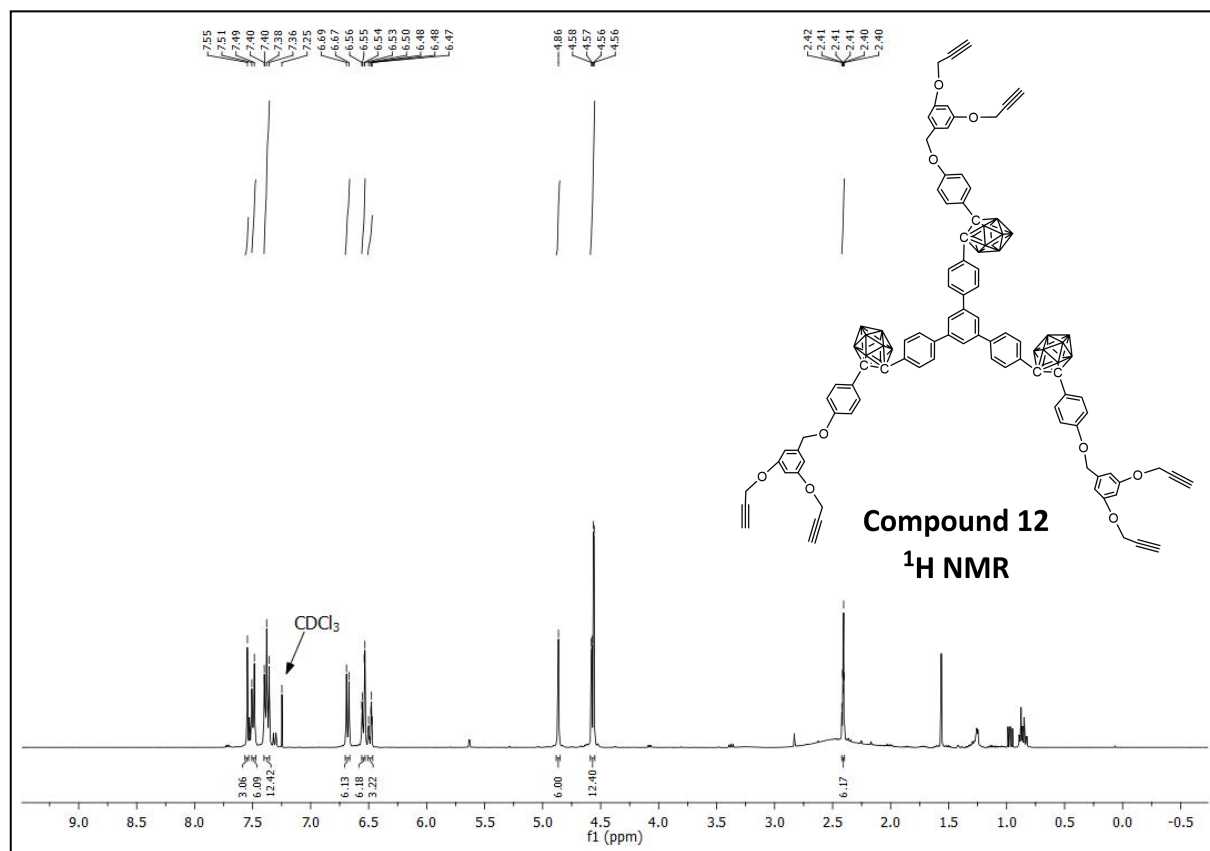

**Figure S18:** <sup>1</sup>H NMR spectra of compound **12** (400 MHz, CDCl<sub>3</sub>)

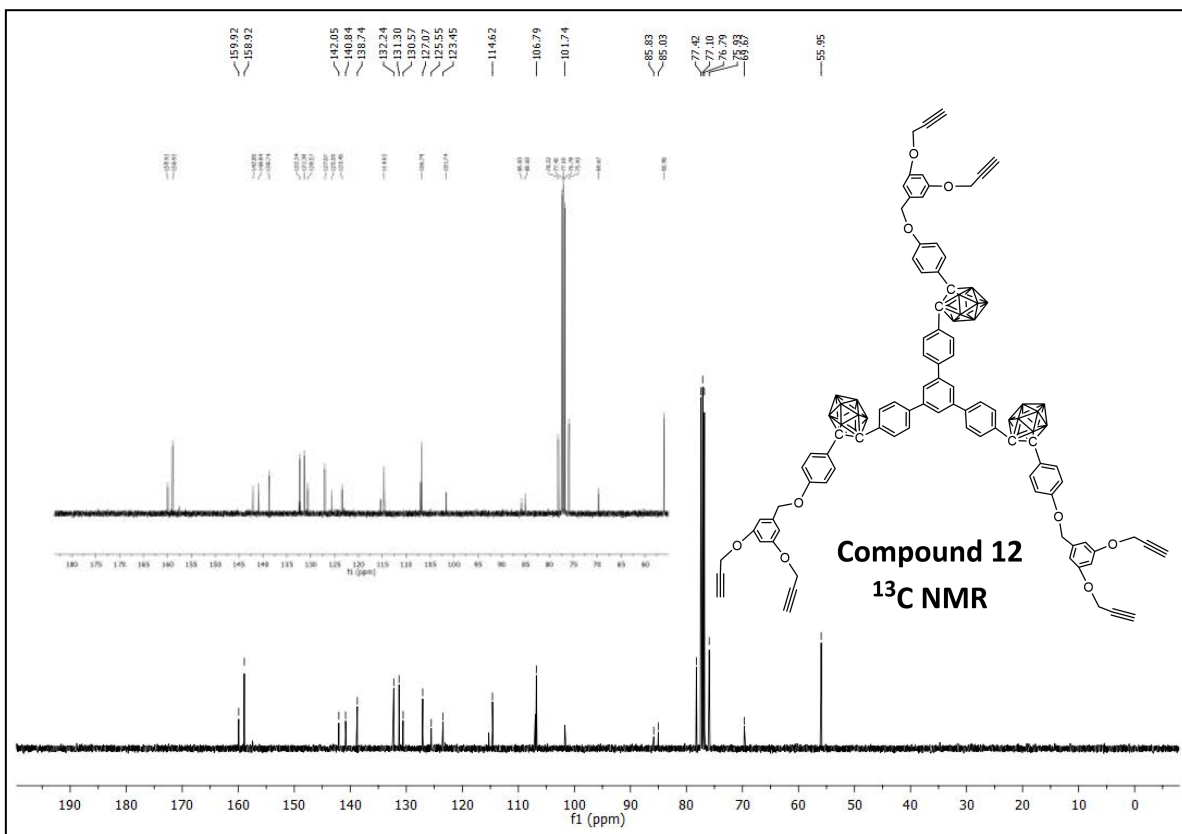

Figure S19: <sup>13</sup>C NMR spectra of compound 12 (100 MHz, CDCl<sub>3</sub>)

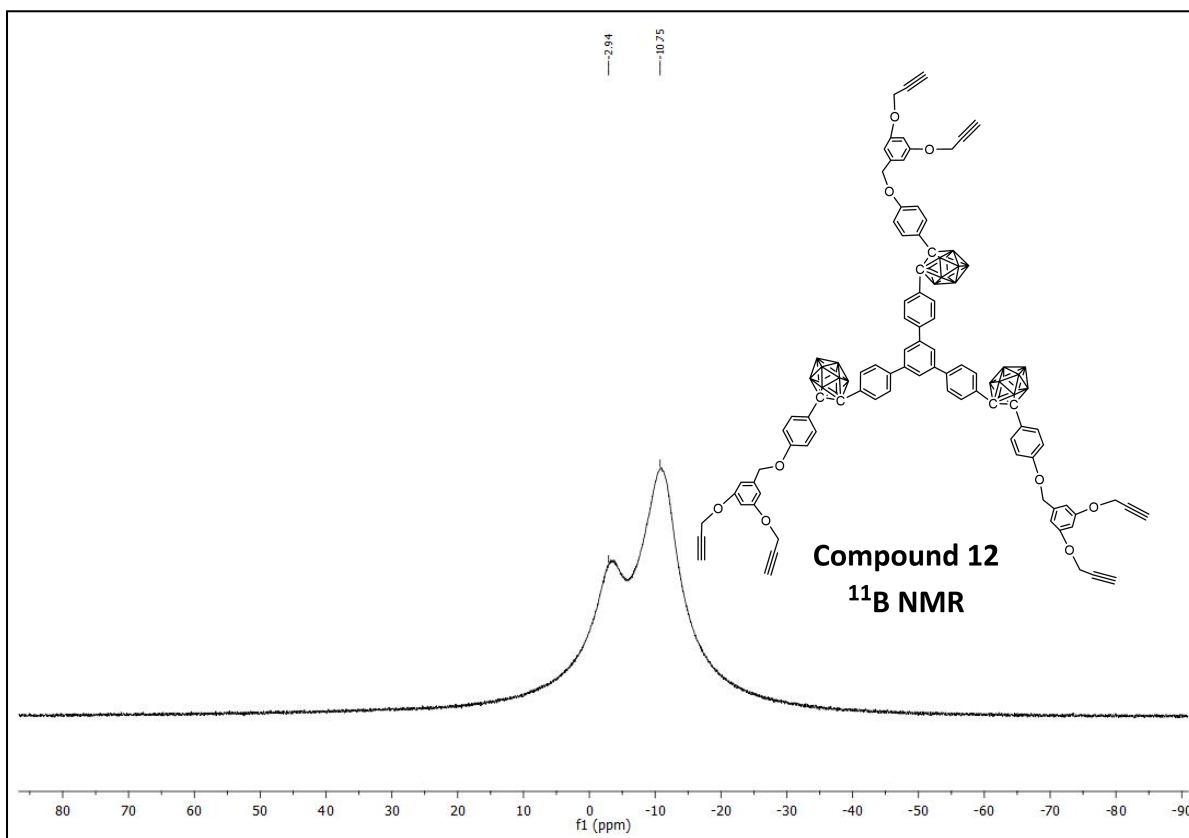

Figure S20: <sup>11</sup>B NMR spectra of compound 12 (128 MHz, CDCl<sub>3</sub>)

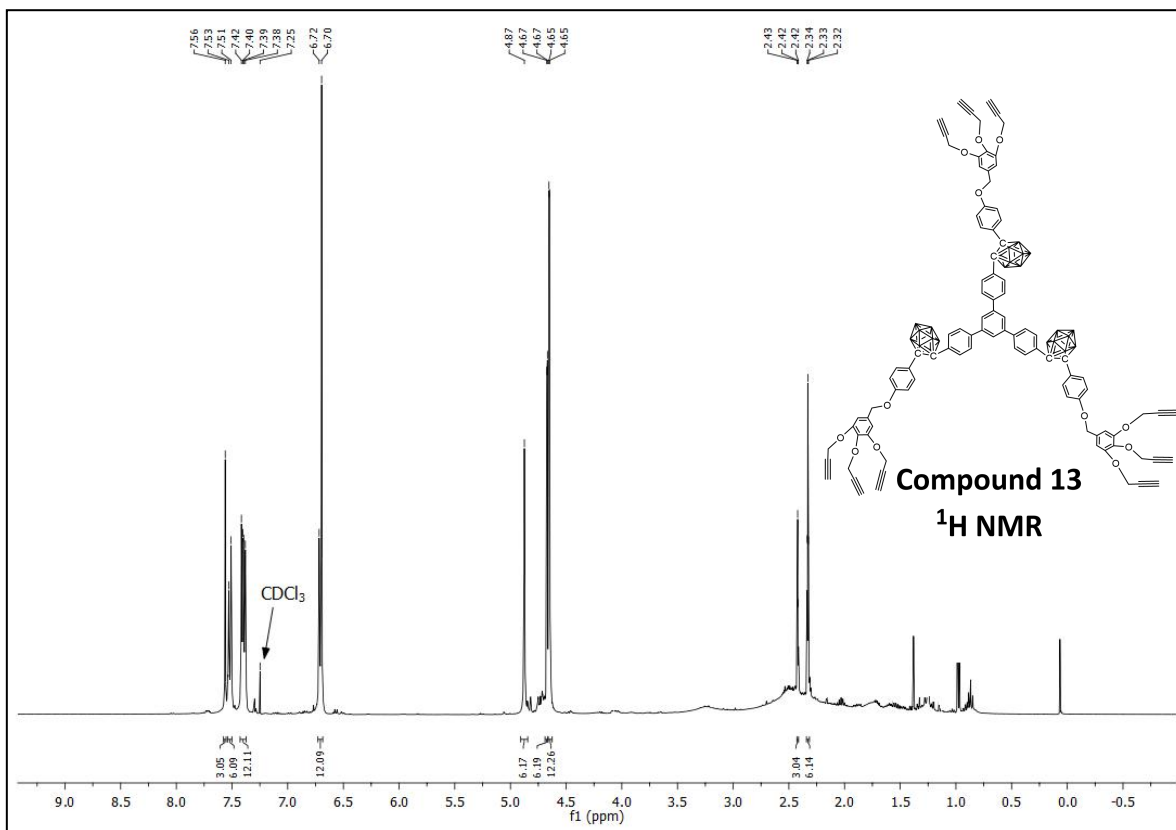

**Figure S21:** <sup>1</sup>H NMR spectra of compound **13** (400 MHz, CDCl<sub>3</sub>)

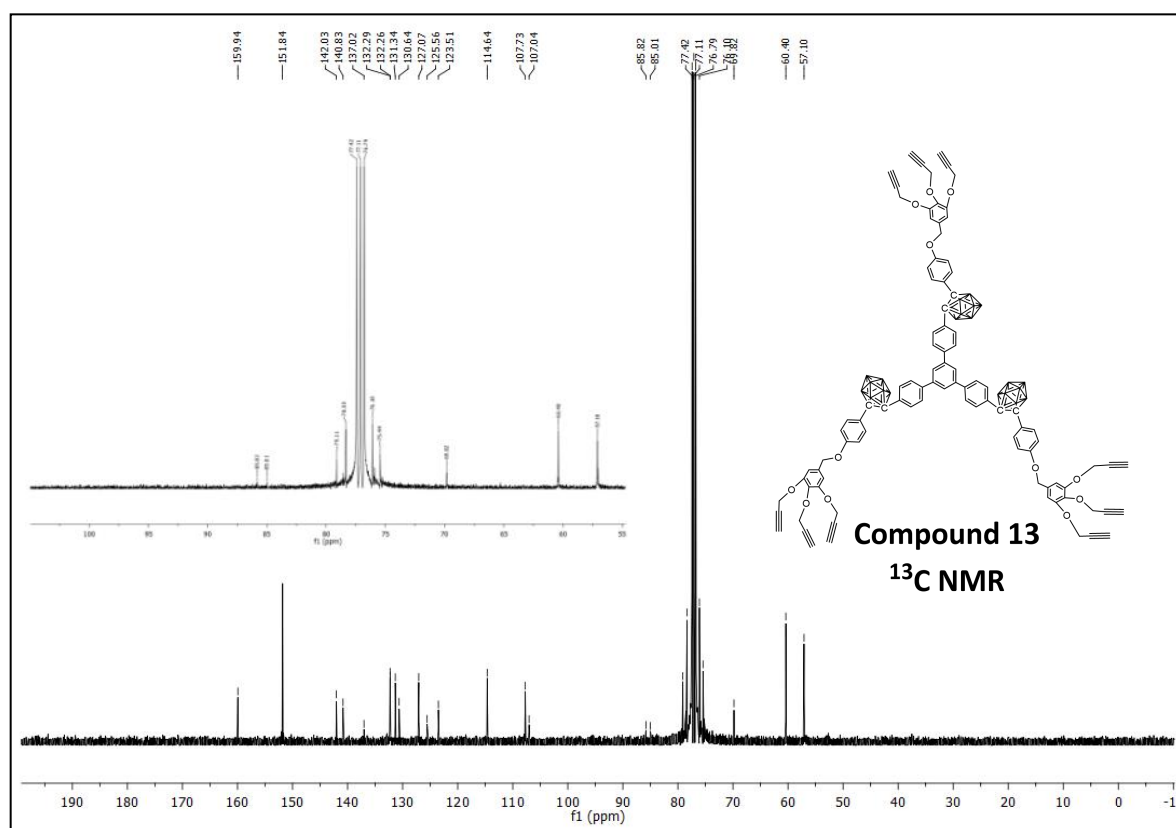

**Figure S22:** <sup>13</sup>C NMR spectra of compound **13** (100 MHz, CDCl<sub>3</sub>)

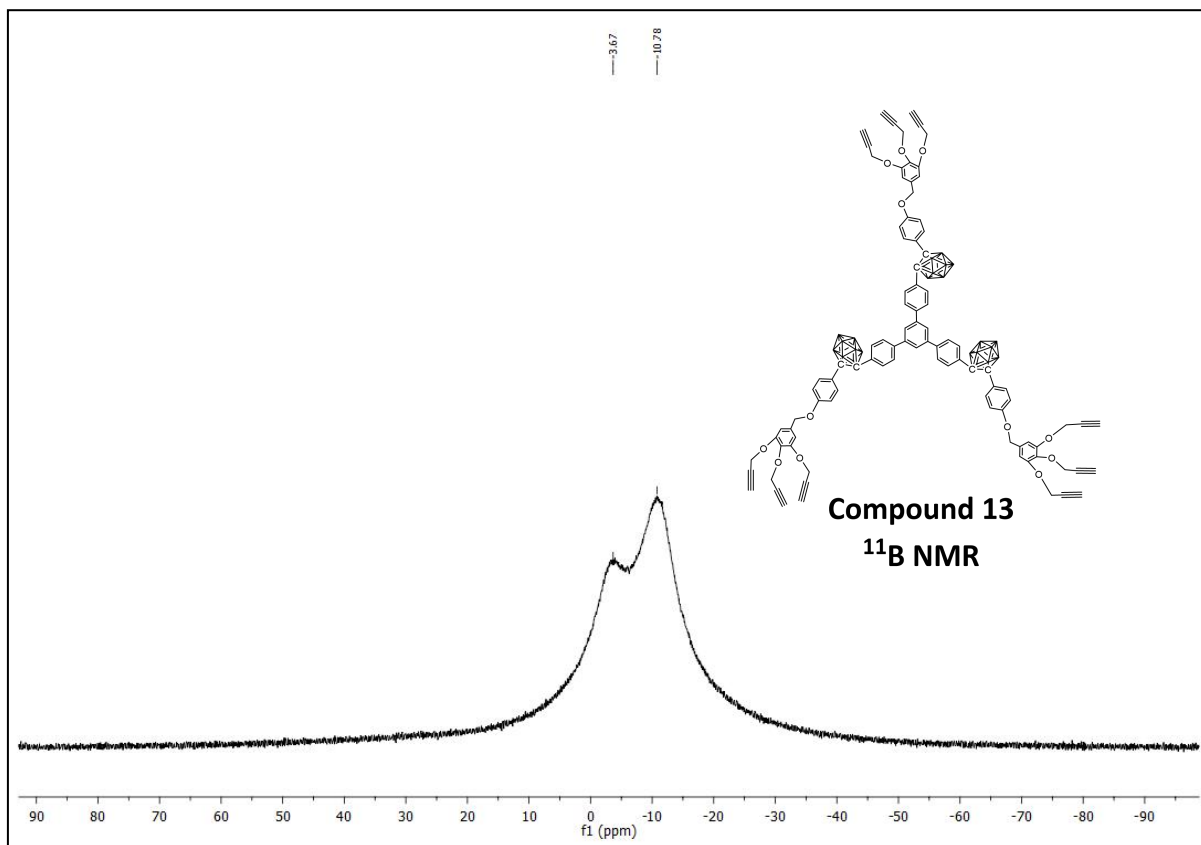

**Figure S23:** <sup>11</sup>B NMR spectra of compound 13 (128 MHz, CDCl<sub>3</sub>)

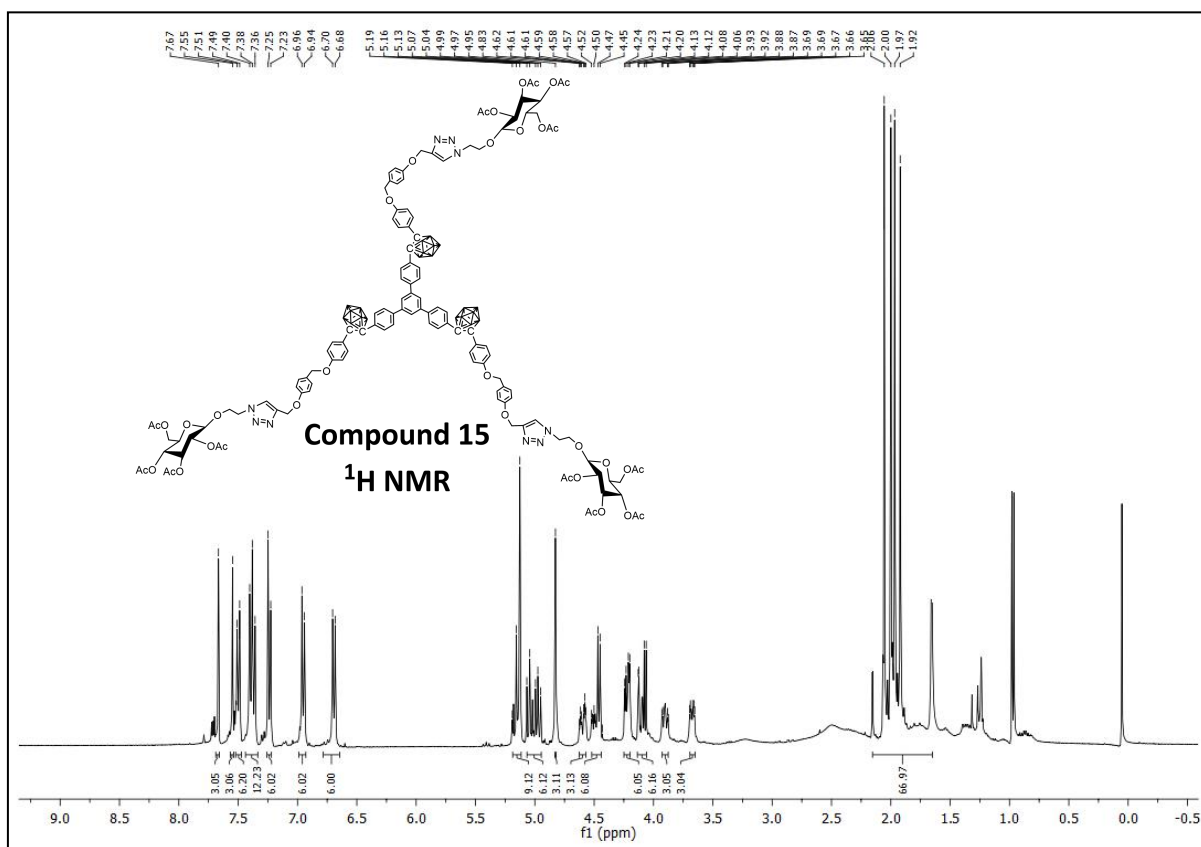

**Figure S24:** <sup>1</sup>H NMR spectra of compound 15 (400 MHz, CDCl<sub>3</sub>)

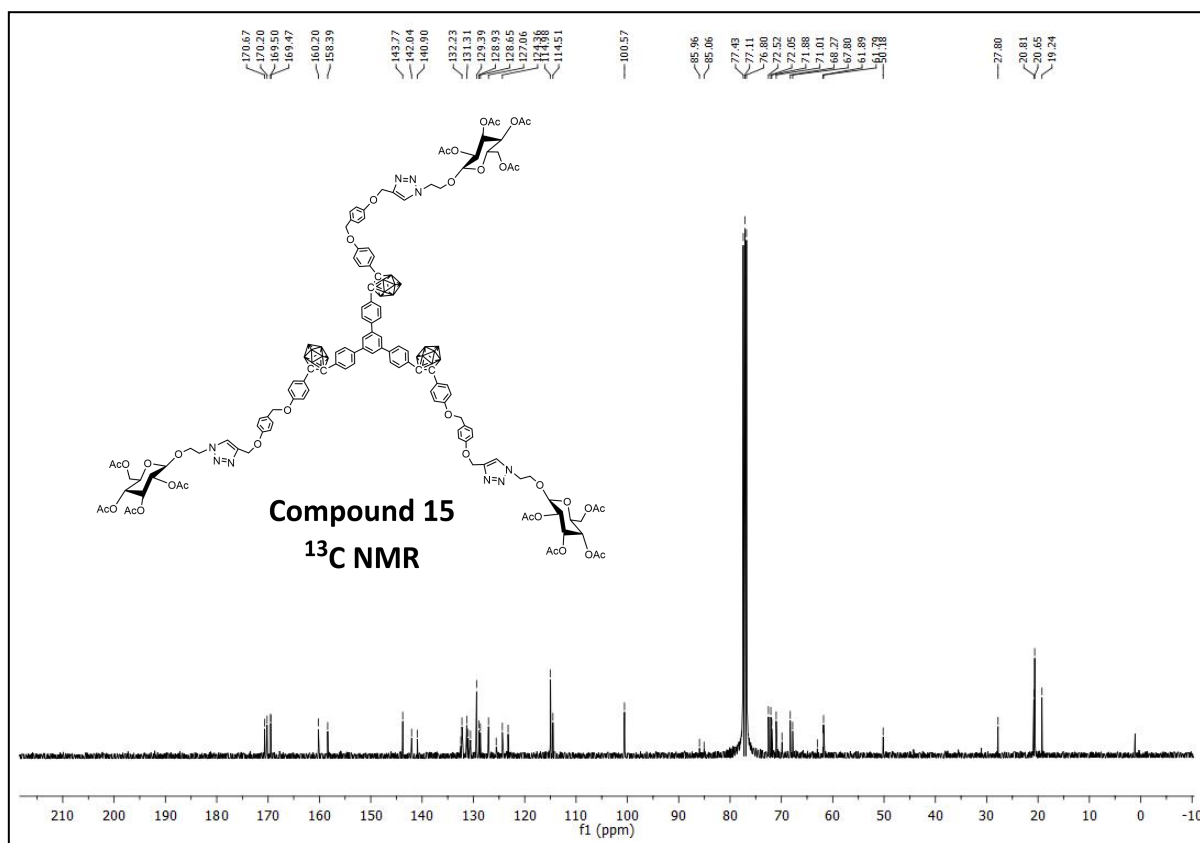

Figure S25: <sup>13</sup>C NMR spectra of compound 15 (100 MHz, CDCl<sub>3</sub>)

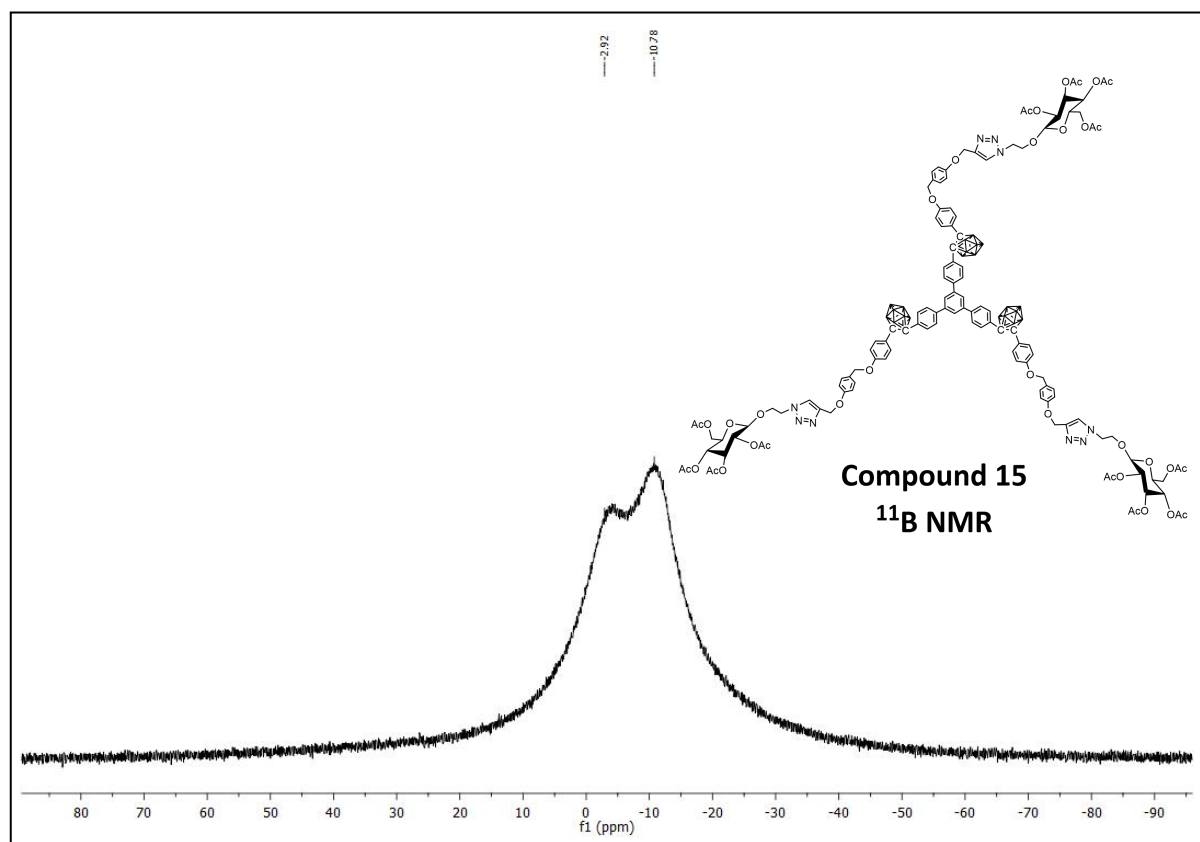

Figure S26: <sup>11</sup>B NMR spectra of compound 15 (128 MHz, CDCl<sub>3</sub>)

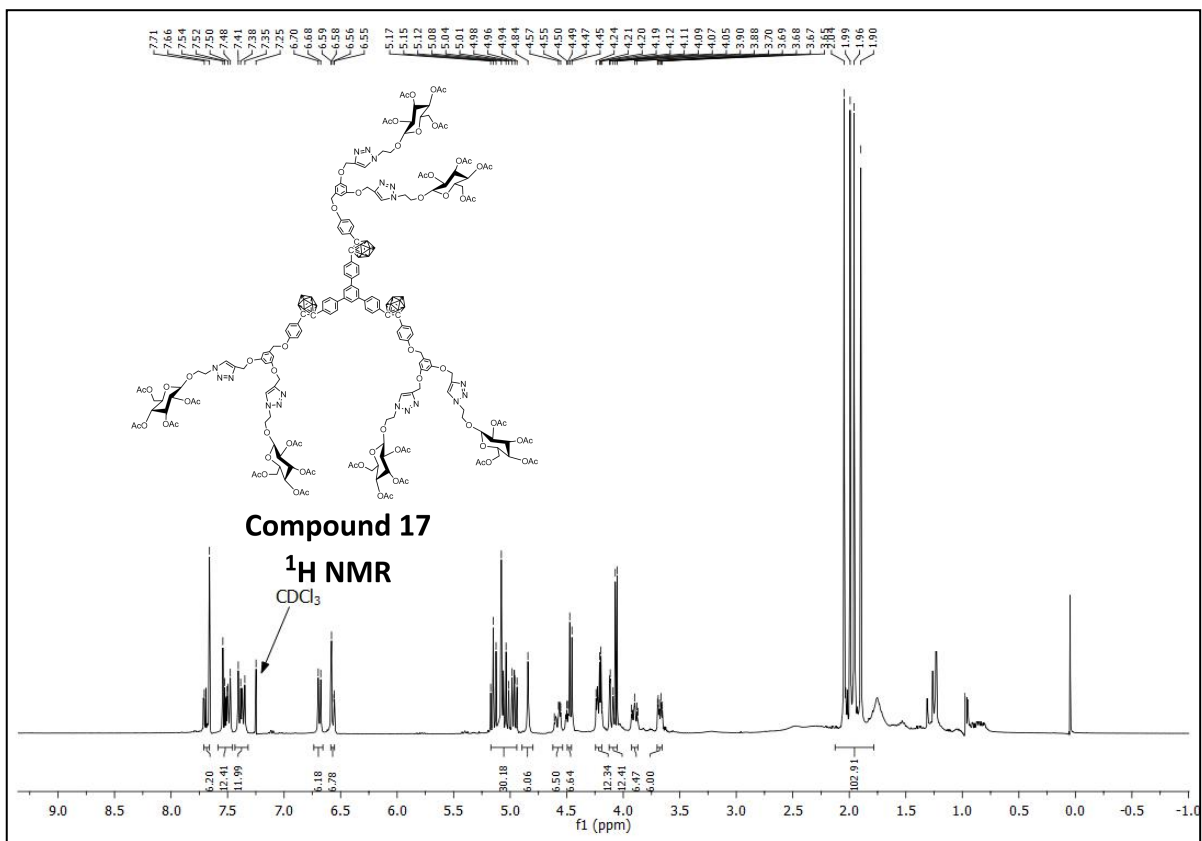

Figure S27: <sup>1</sup>H NMR spectra of compound 17 (400 MHz, CDCl<sub>3</sub>)

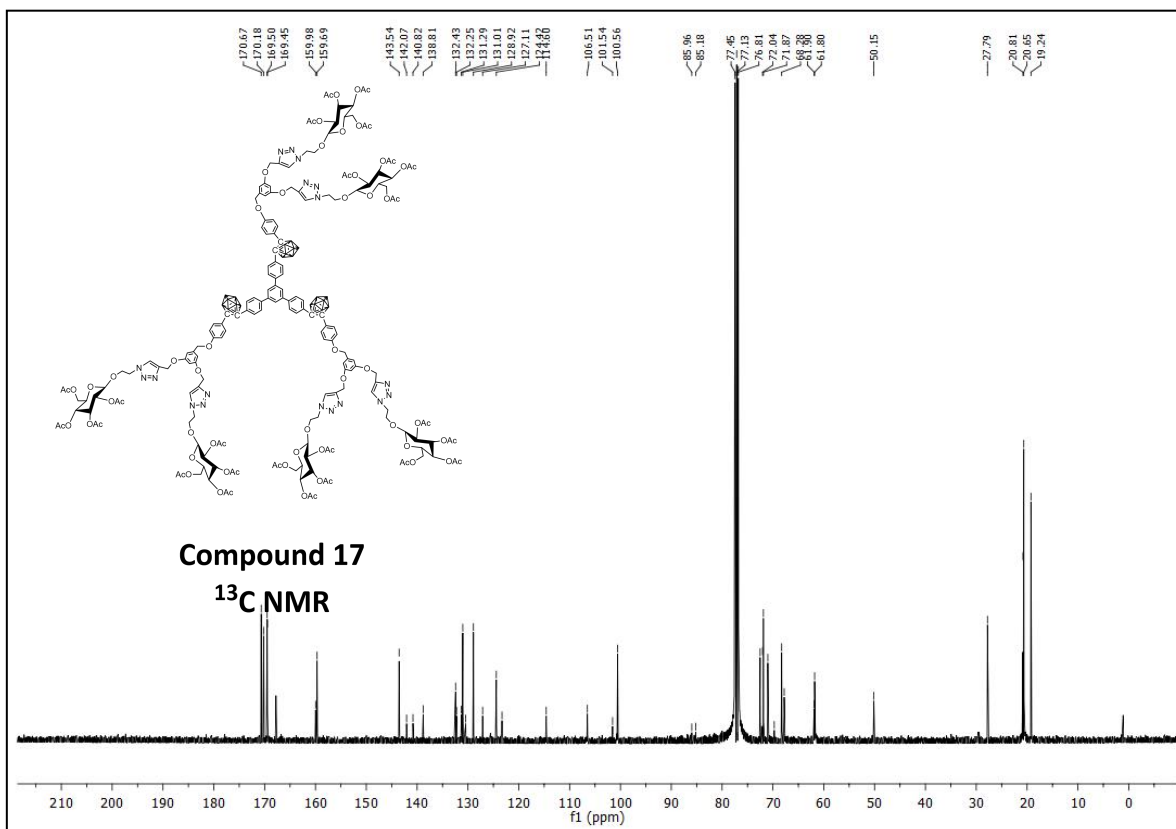

Figure S28: <sup>13</sup>C NMR spectra of compound 17 (100 MHz, CDCl<sub>3</sub>)

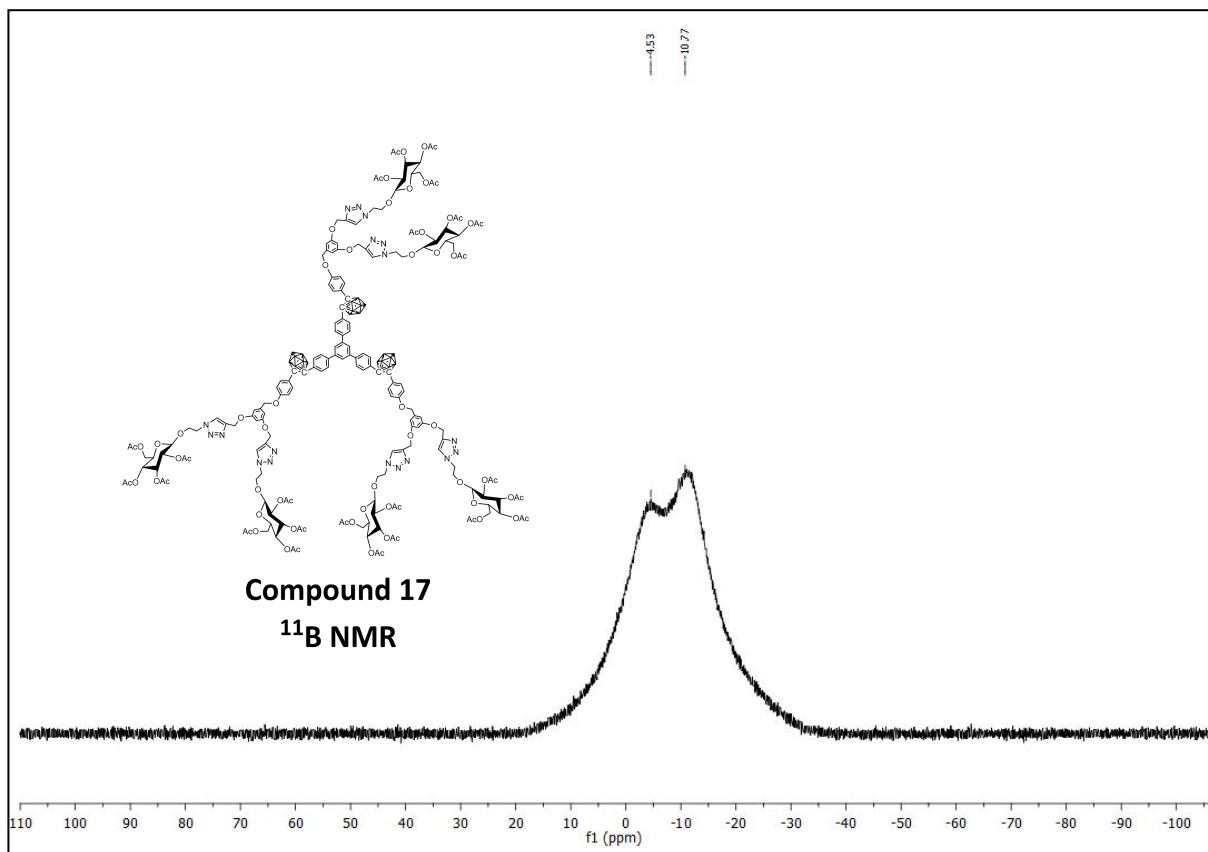

**Figure S29:** <sup>11</sup>B NMR spectra of compound **17** (128 MHz, CDCl<sub>3</sub>)

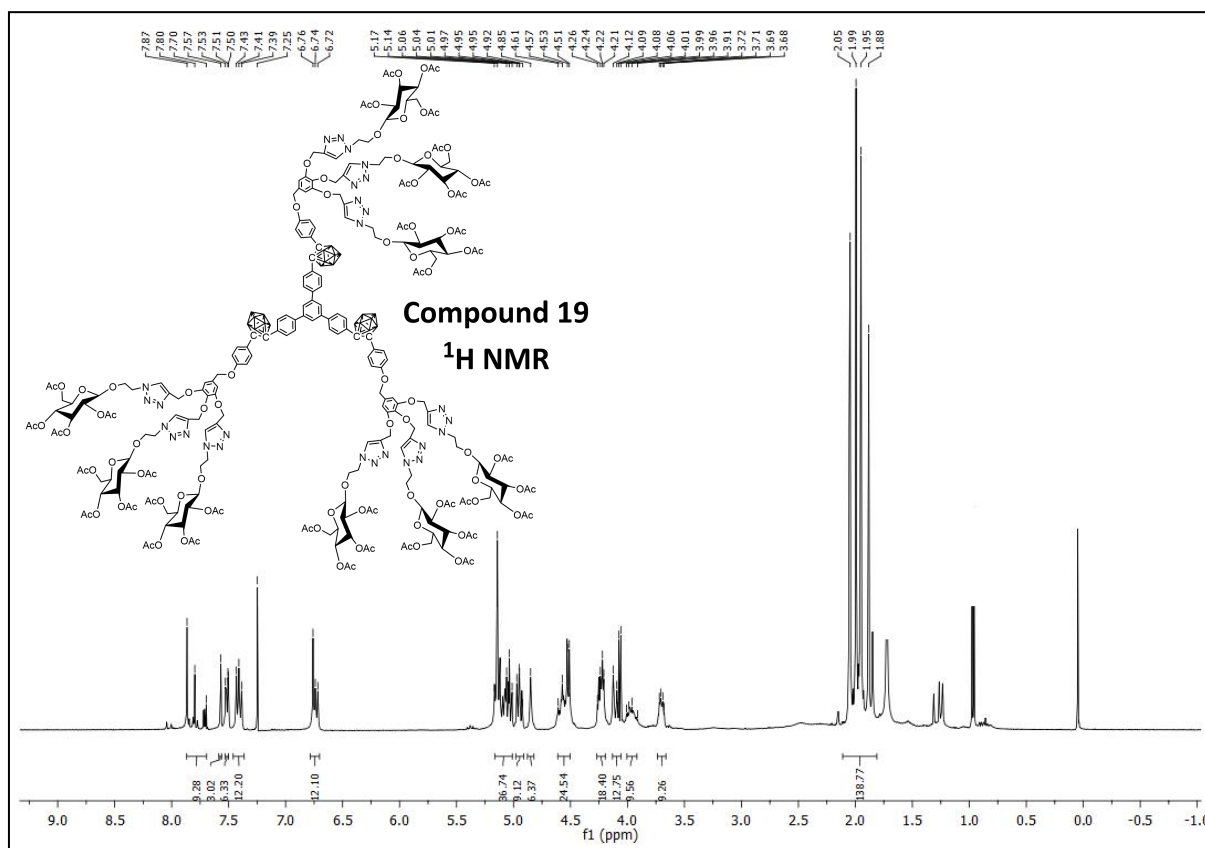

**Figure S30:** <sup>1</sup>H NMR spectra of compound **19** (400 MHz, CDCl<sub>3</sub>)



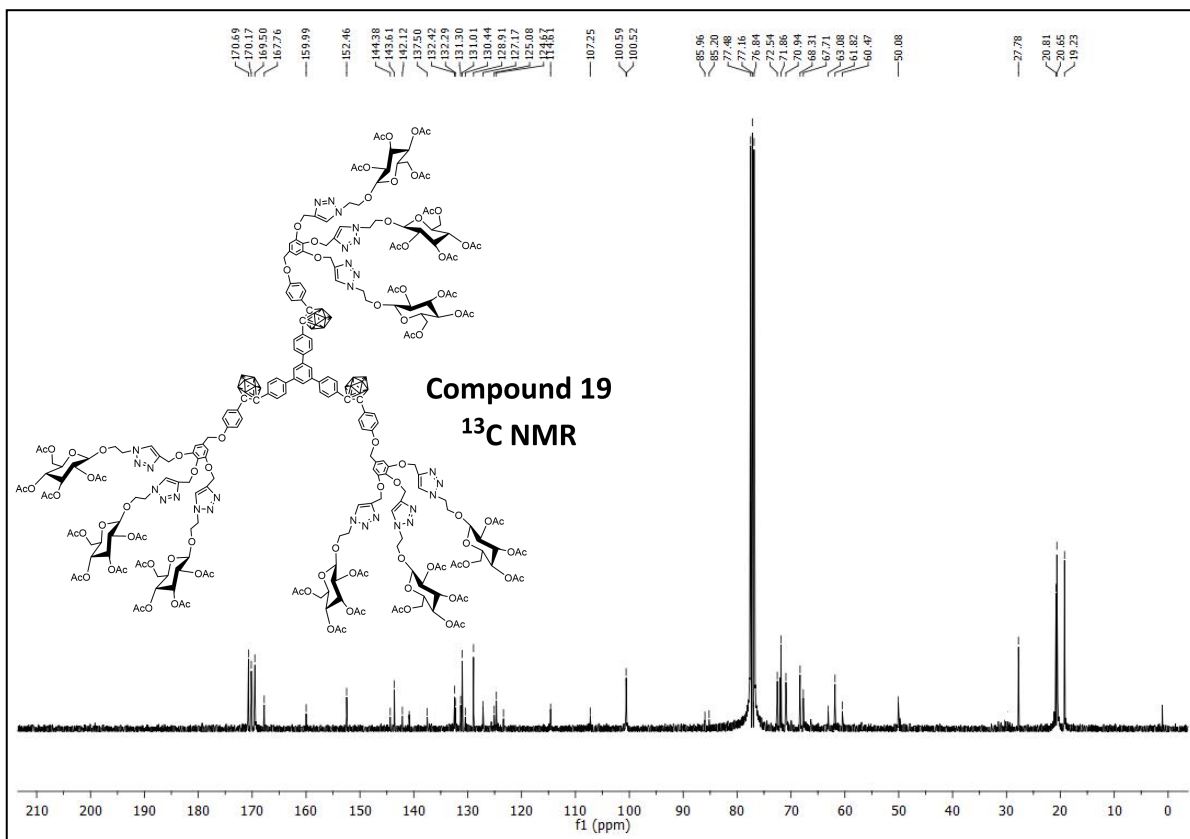

**Figure S31:** <sup>13</sup>C NMR spectra of compound **19** (100 MHz, CDCl<sub>3</sub>)

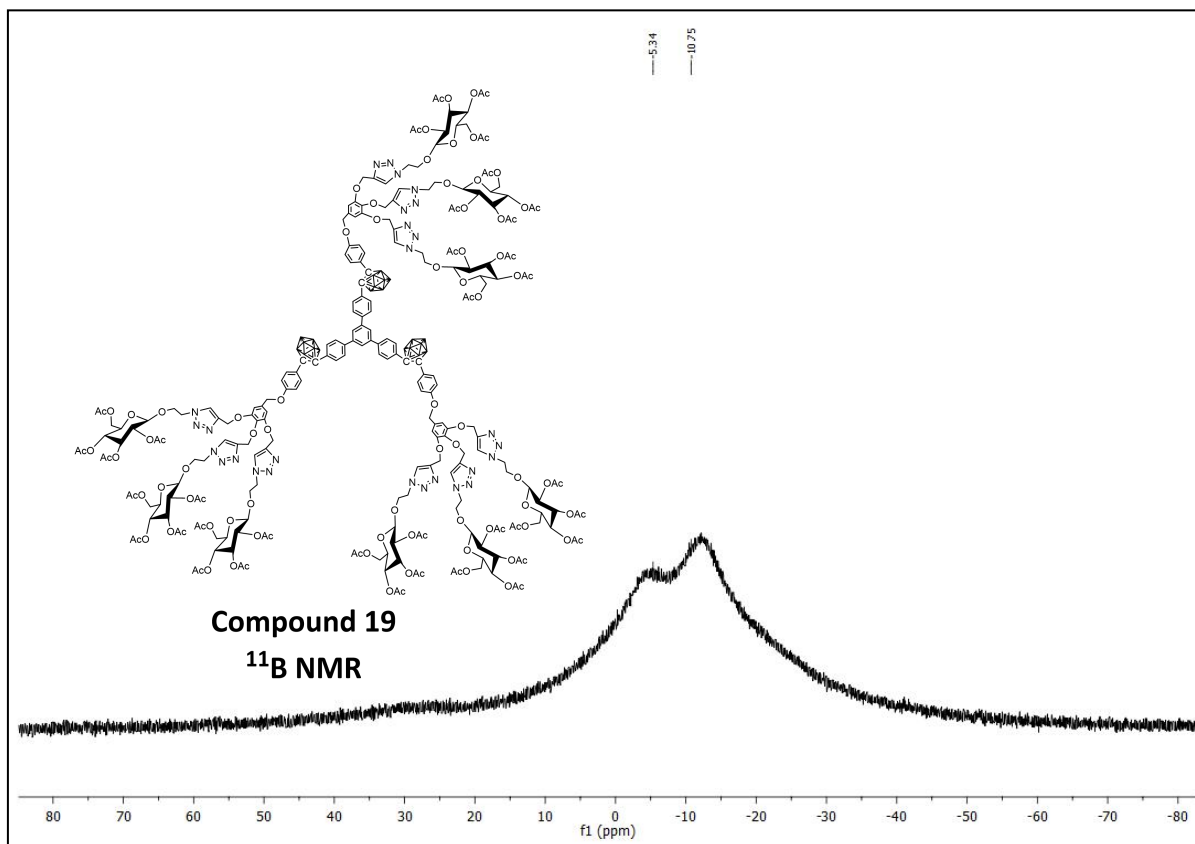

**Figure S32:** <sup>11</sup>B NMR spectra of compound **19** (128 MHz, CDCl<sub>3</sub>)

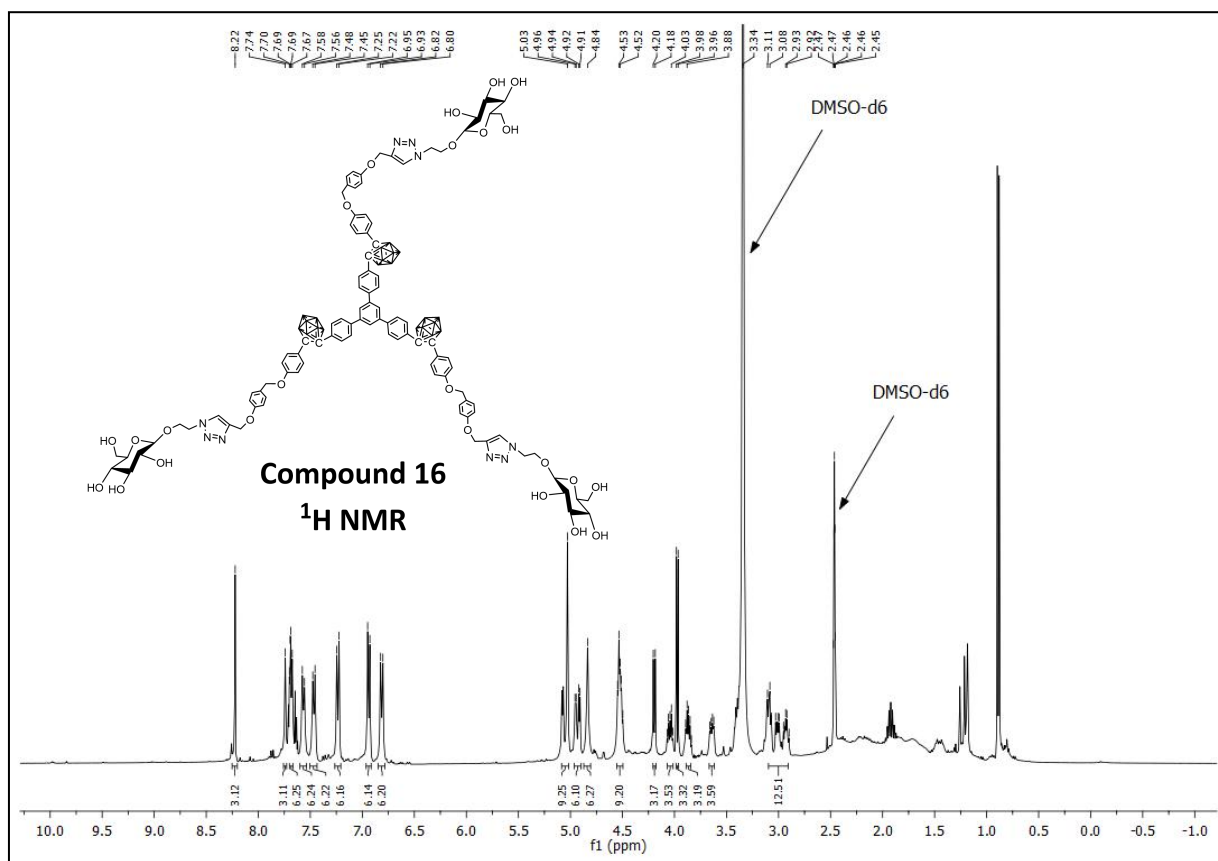

**Figure S33:** <sup>1</sup>H NMR spectra of compound **16** (400 MHz, DMSO-d<sub>6</sub>)

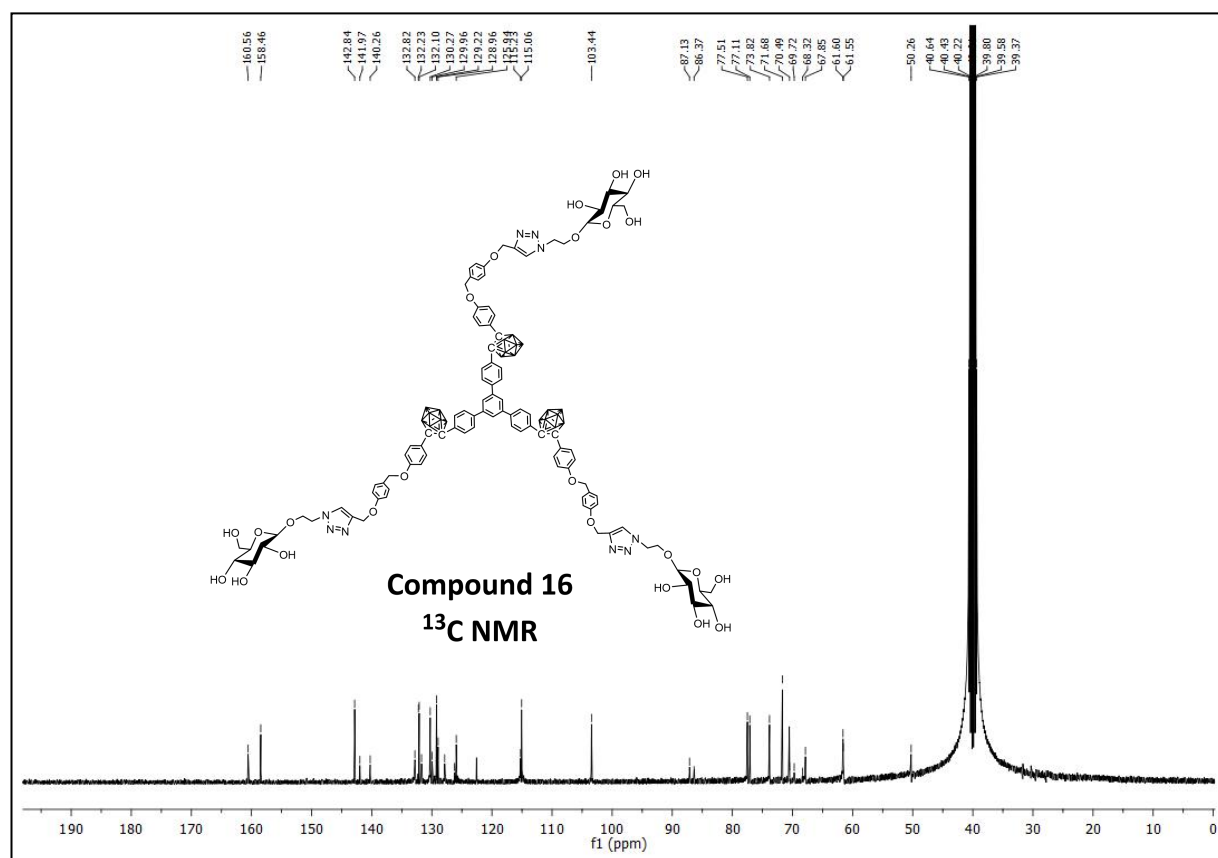

**Figure S34:** <sup>13</sup>C NMR spectra of compound **16** (100 MHz, DMSO-d<sub>6</sub>)

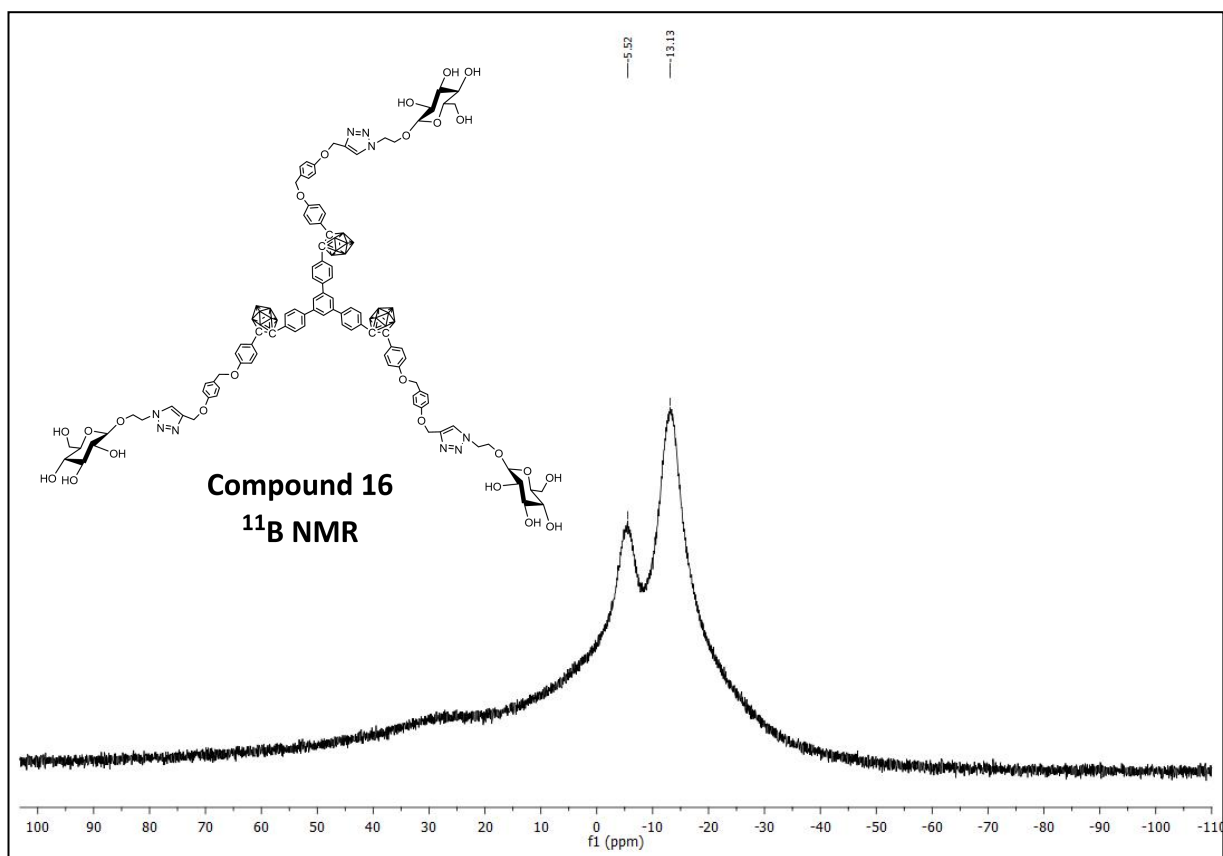

**Figure S35:** <sup>11</sup>B NMR spectra of compound **16** (128 MHz, DMSO-d<sub>6</sub>)

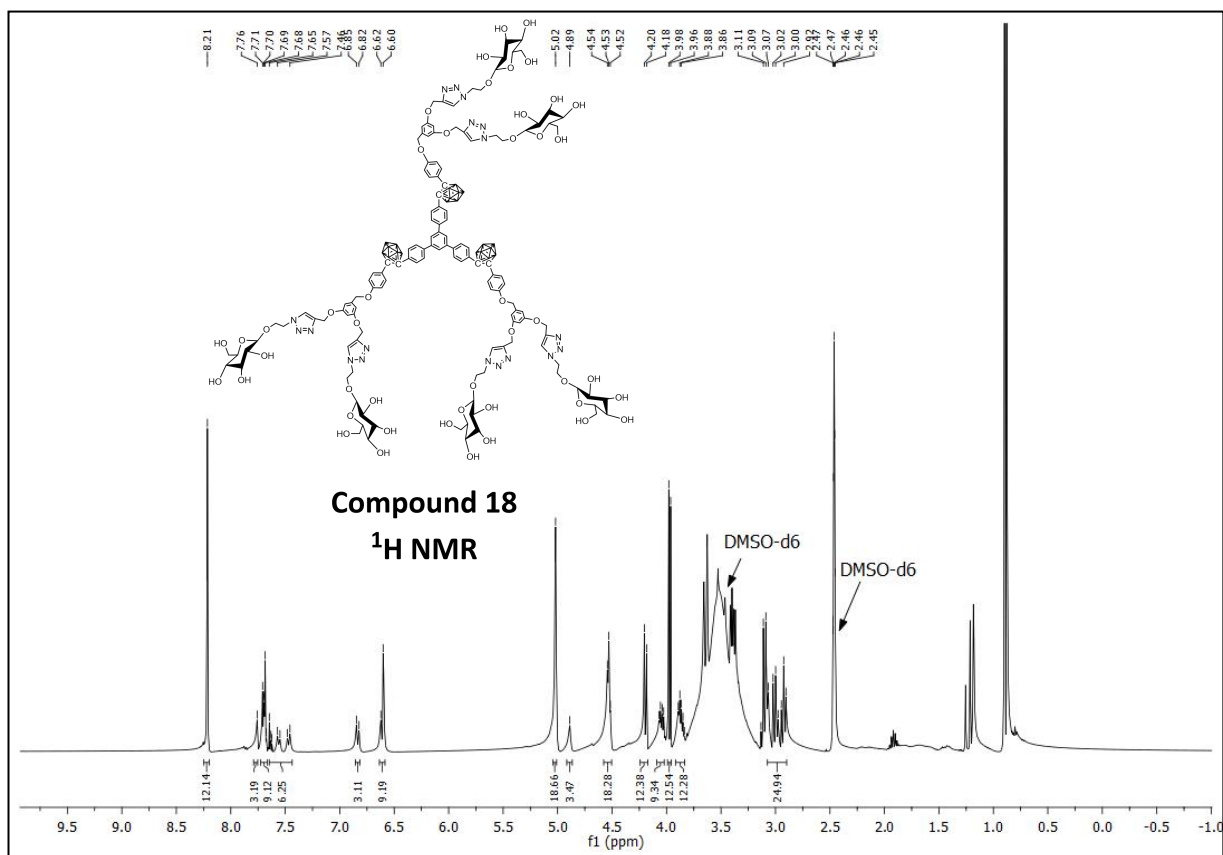

**Figure S36:** <sup>1</sup>H NMR spectra of compound **18** (400 MHz, DMSO-d<sub>6</sub>)

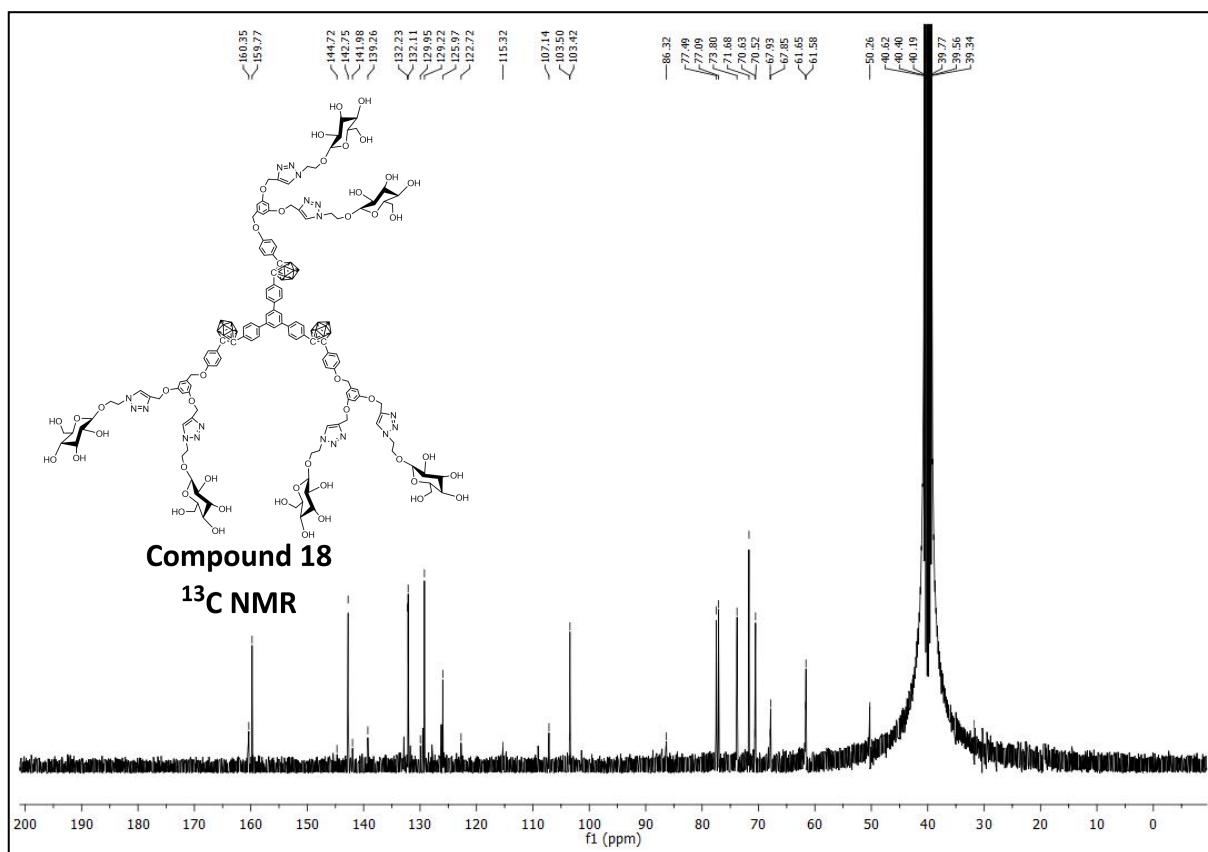

**Figure S37:** <sup>13</sup>C NMR spectra of compound **18** (100 MHz, DMSO-d<sub>6</sub>)

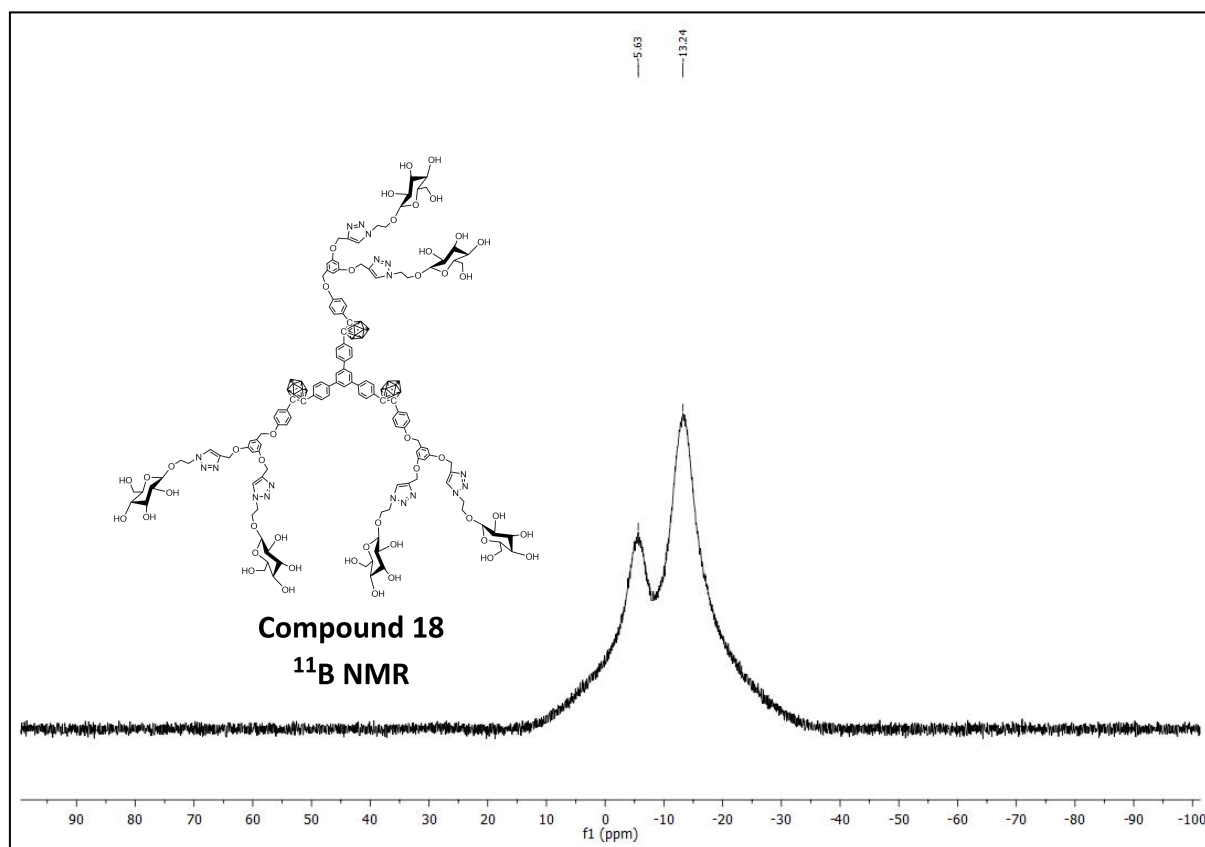

**Figure S38:** <sup>11</sup>B NMR spectra of compound **18** (128 MHz, DMSO-d<sub>6</sub>)

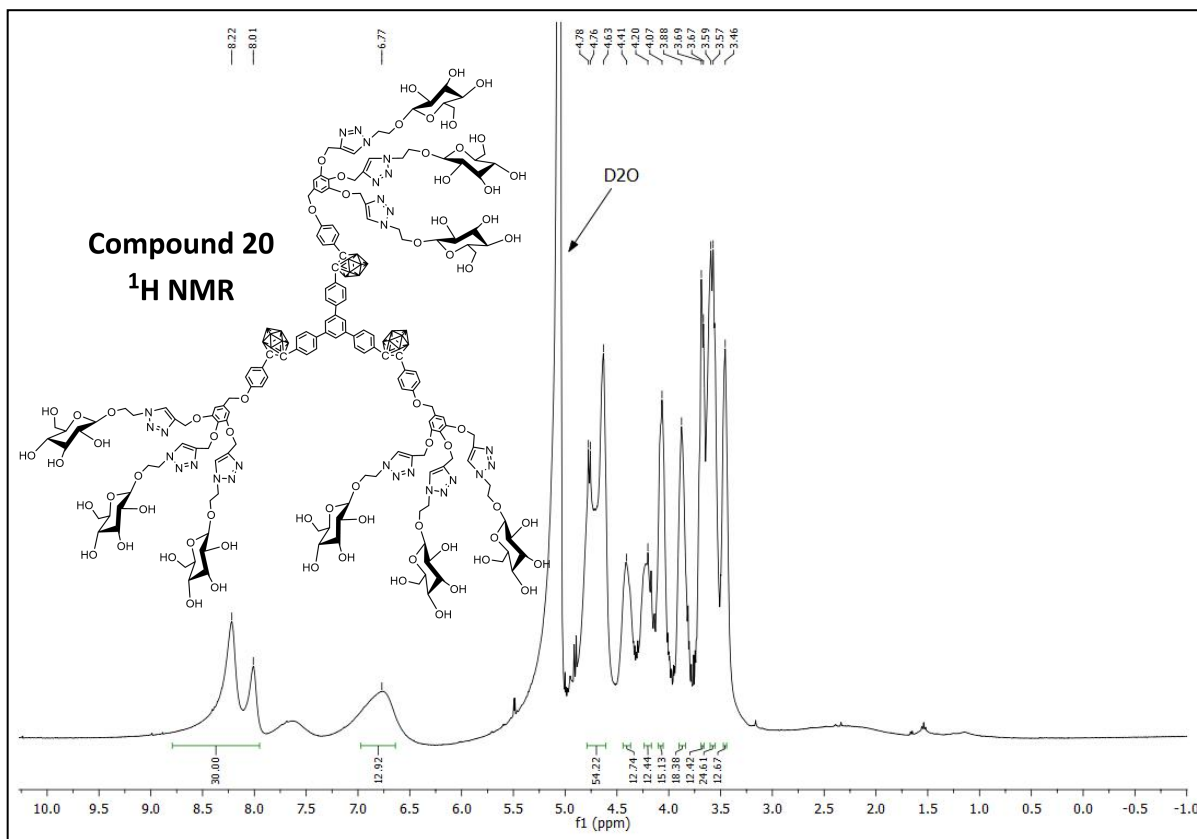

**Figure S39:** <sup>1</sup>H NMR spectra of compound **20** (400 MHz, D<sub>2</sub>O)

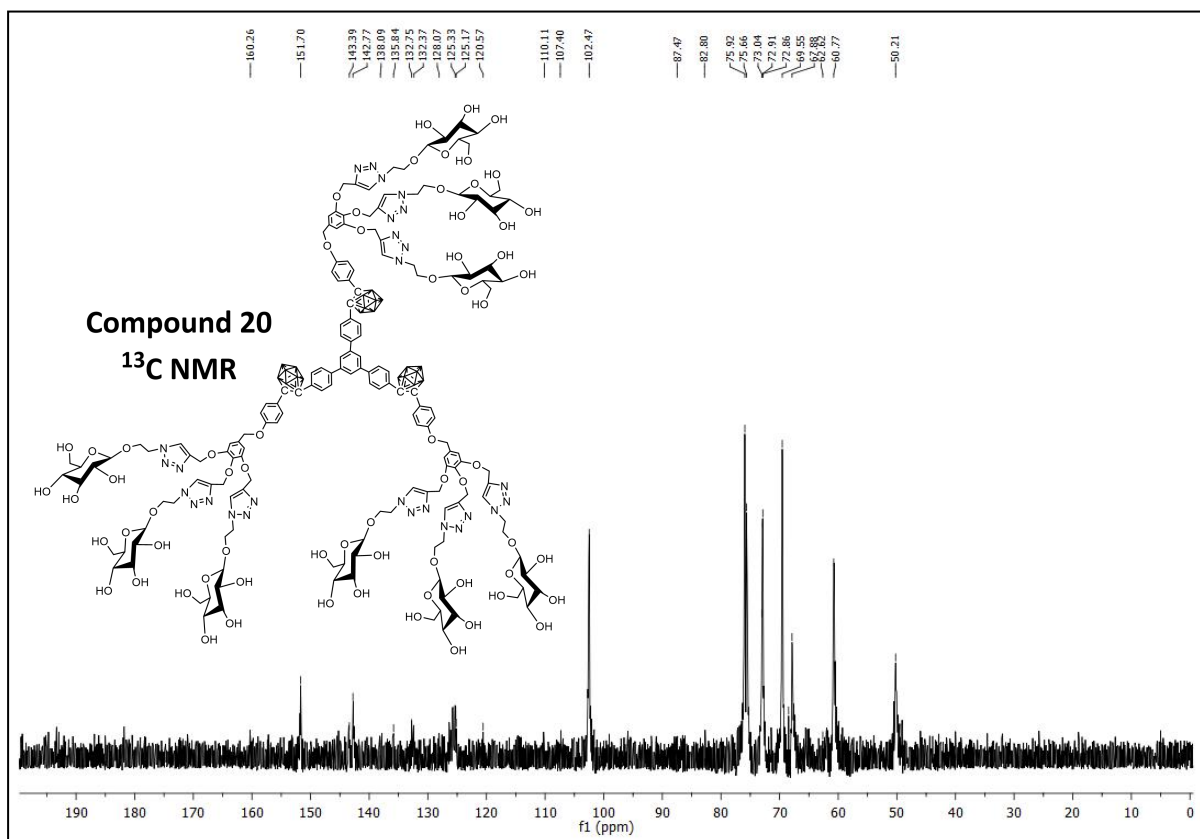

**Figure S40:** <sup>13</sup>C NMR spectra of compound **20** (400 MHz, D<sub>2</sub>O)

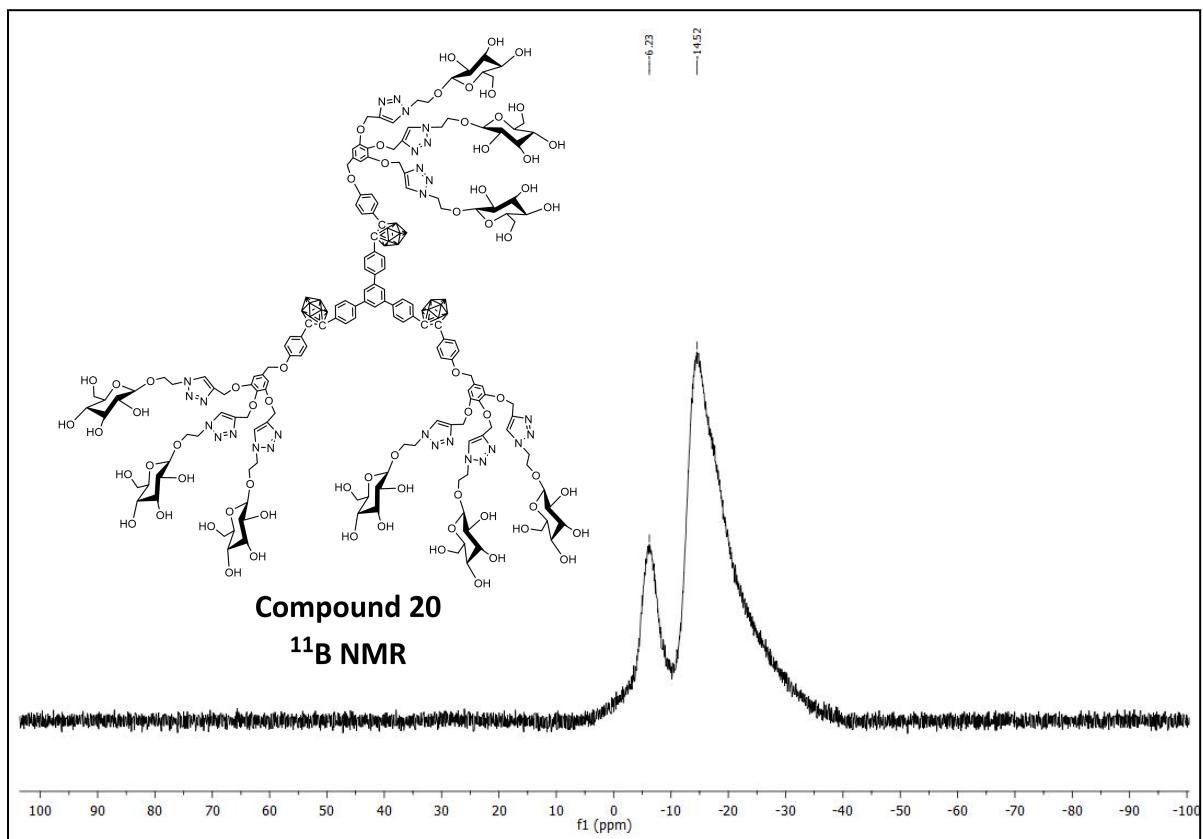

**Figure S41:** <sup>11</sup>B NMR spectra of compound **20** (400 MHz, D<sub>2</sub>O)

## Mass Spectra of Synthesized Compounds

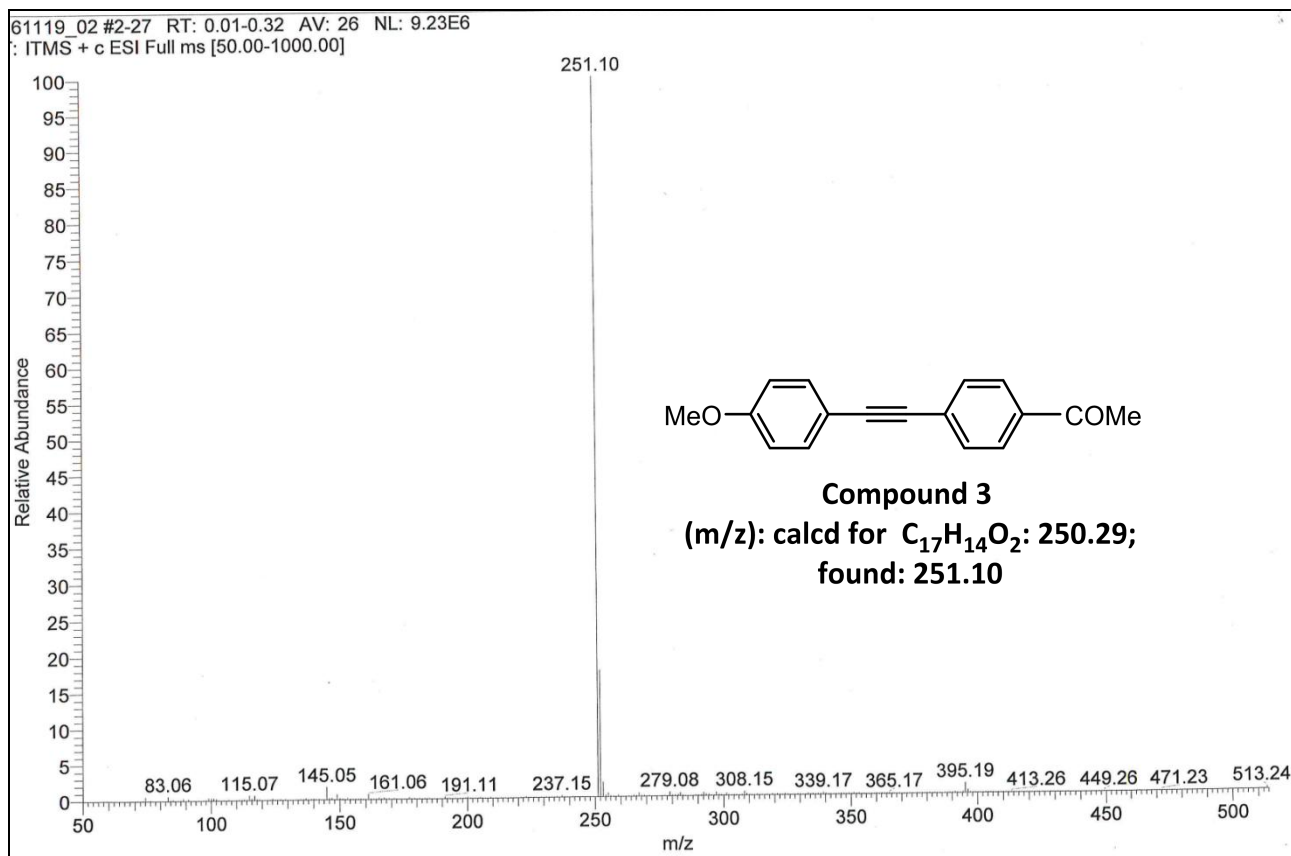

Figure S42: Mass spectra of compound 3

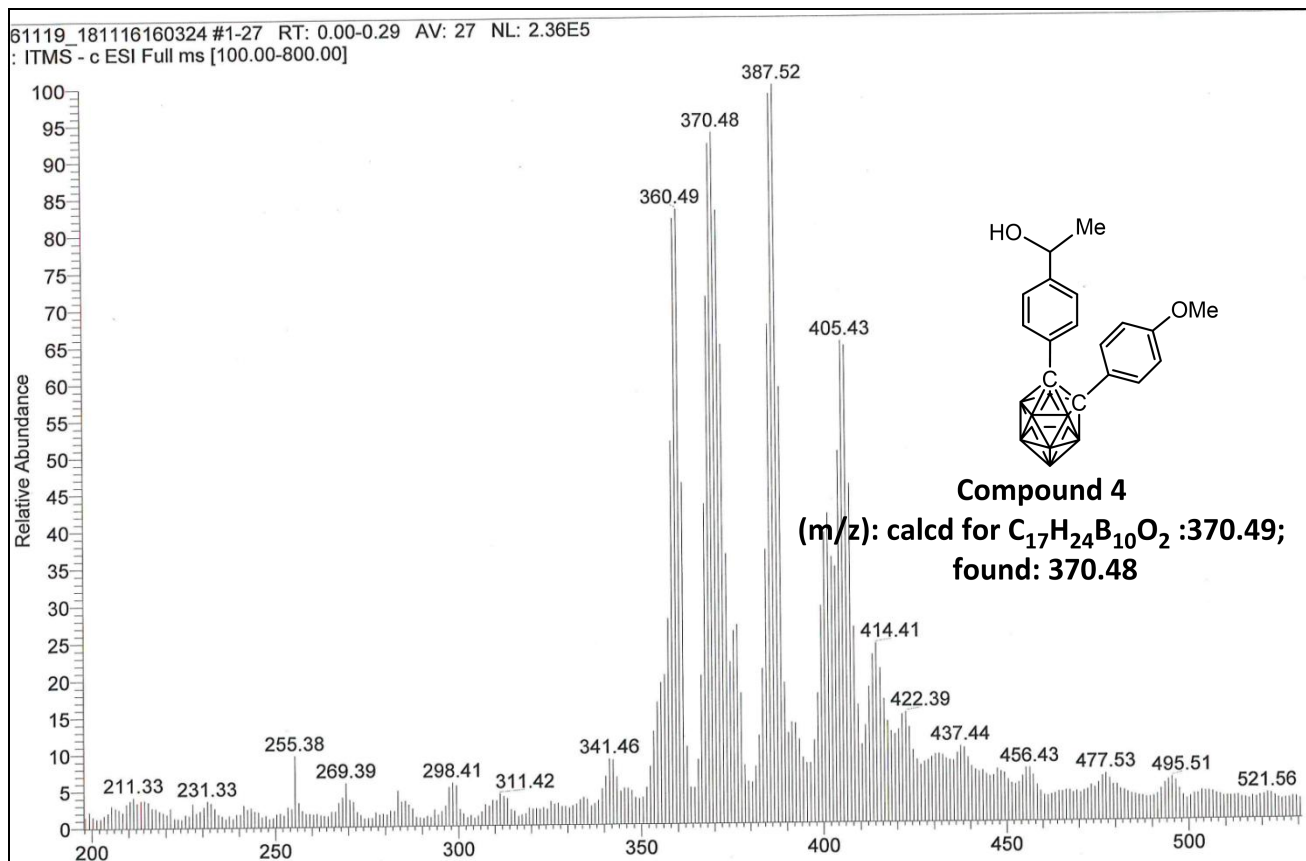

Figure S43: Mass spectra of compound 4

61119\_05 #2-30 RT: 0.01-0.33 AV: 29 NL: 3.35E5  
ITMS + c ESI Full ms [100.00-800.00]

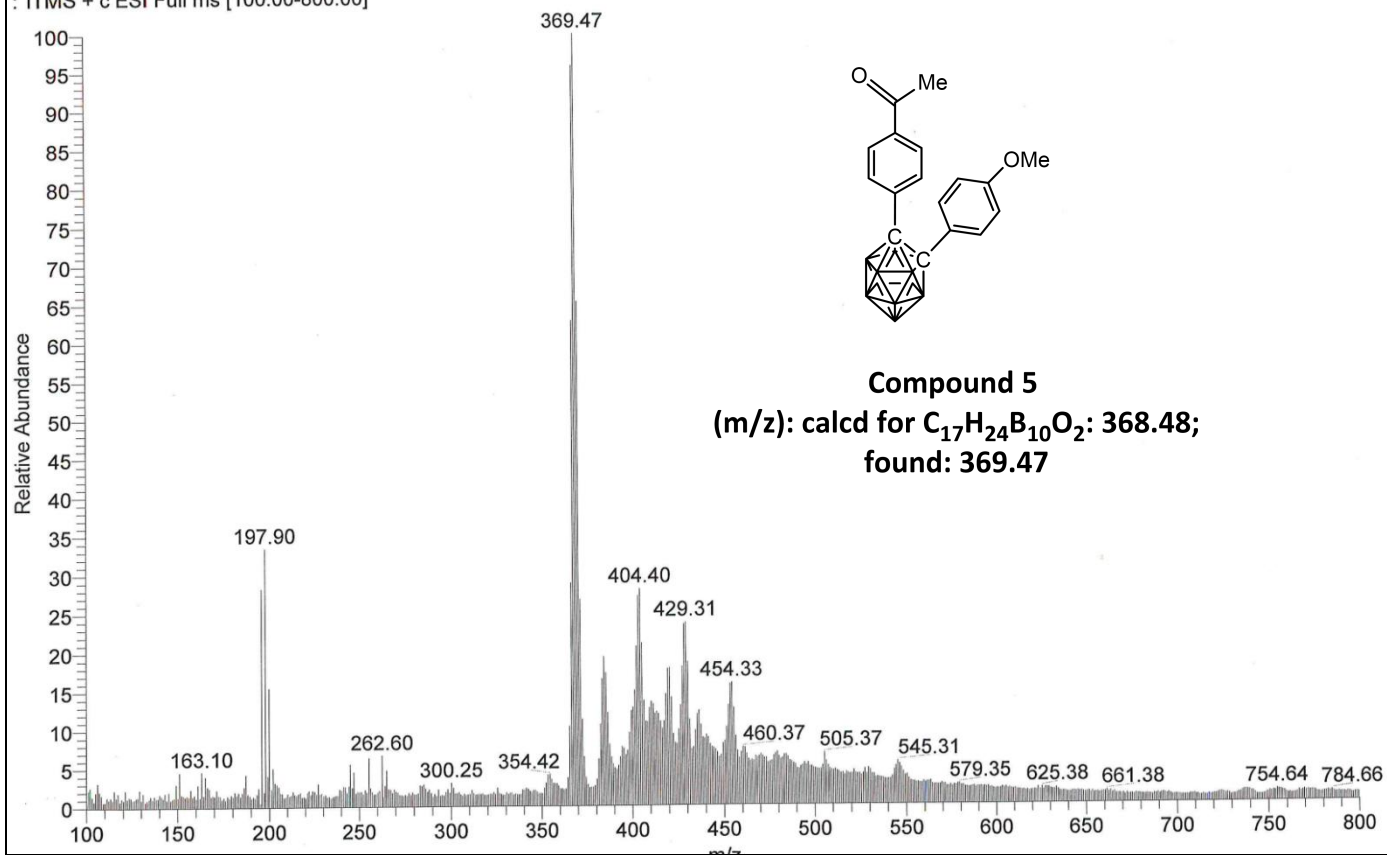

Figure S44: Mass spectra of compound 5

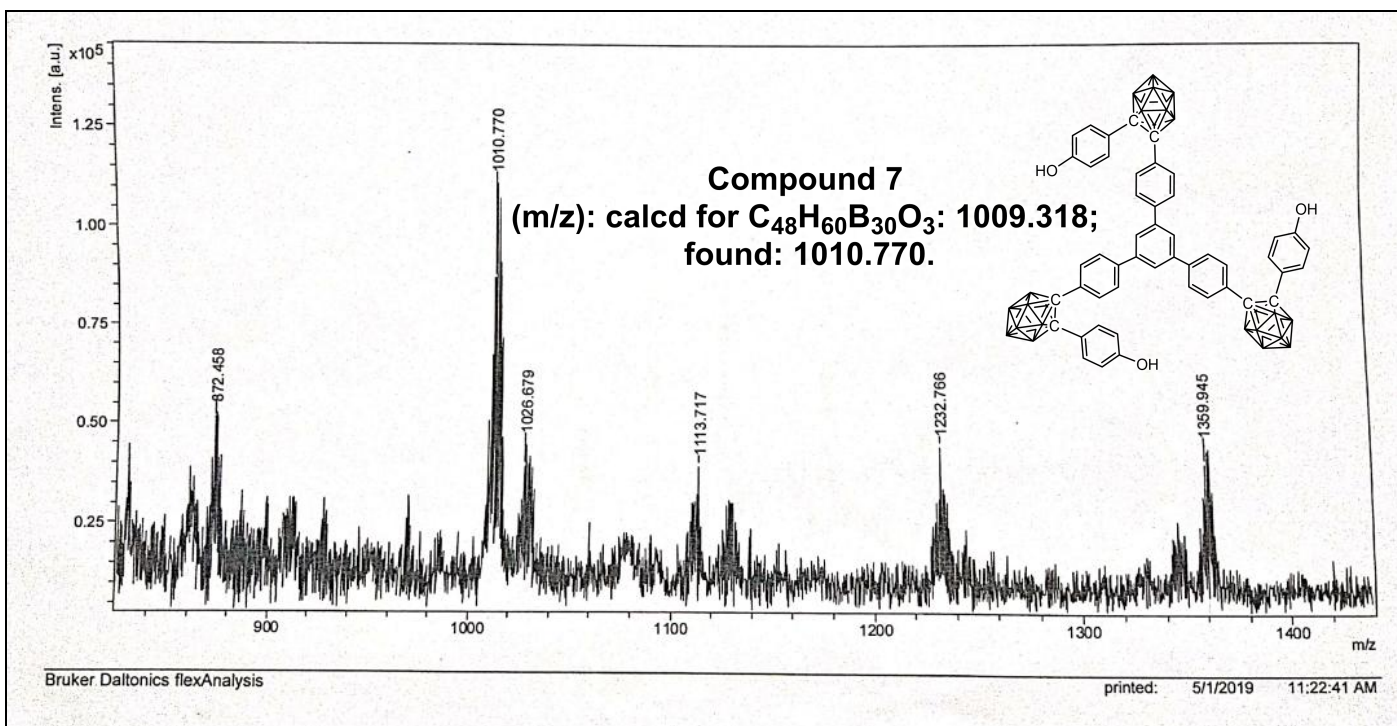



Figure S46: Mass spectra of compound 7

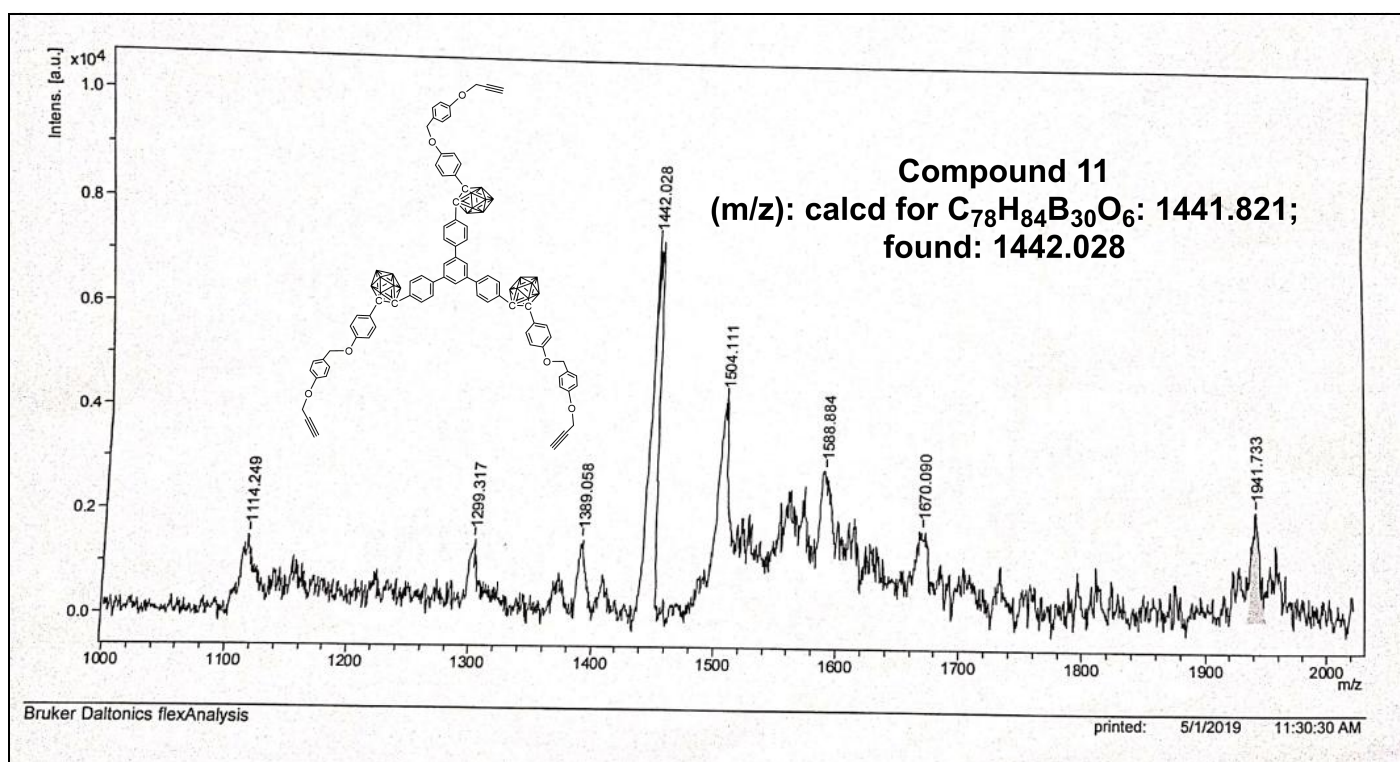

Figure S47: Mass spectra of compound 11

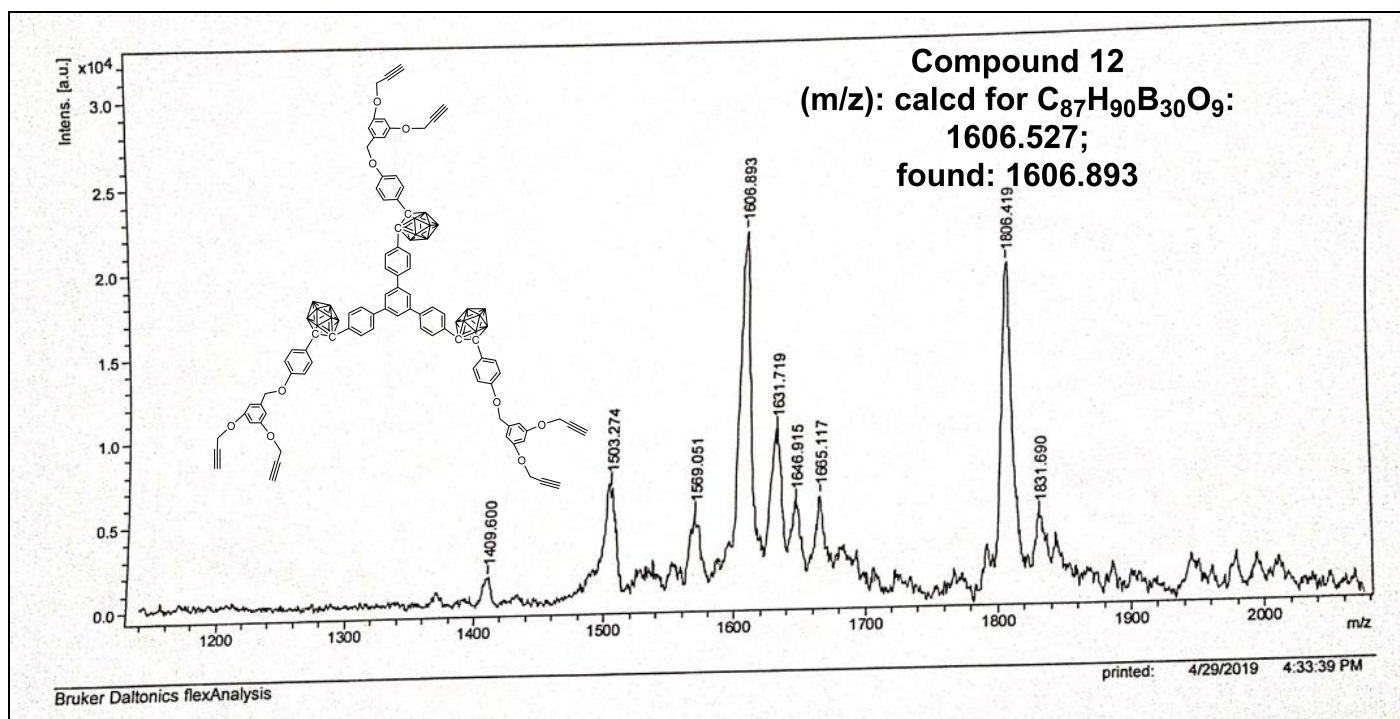

Figure S48: Mass spectra of compound 12

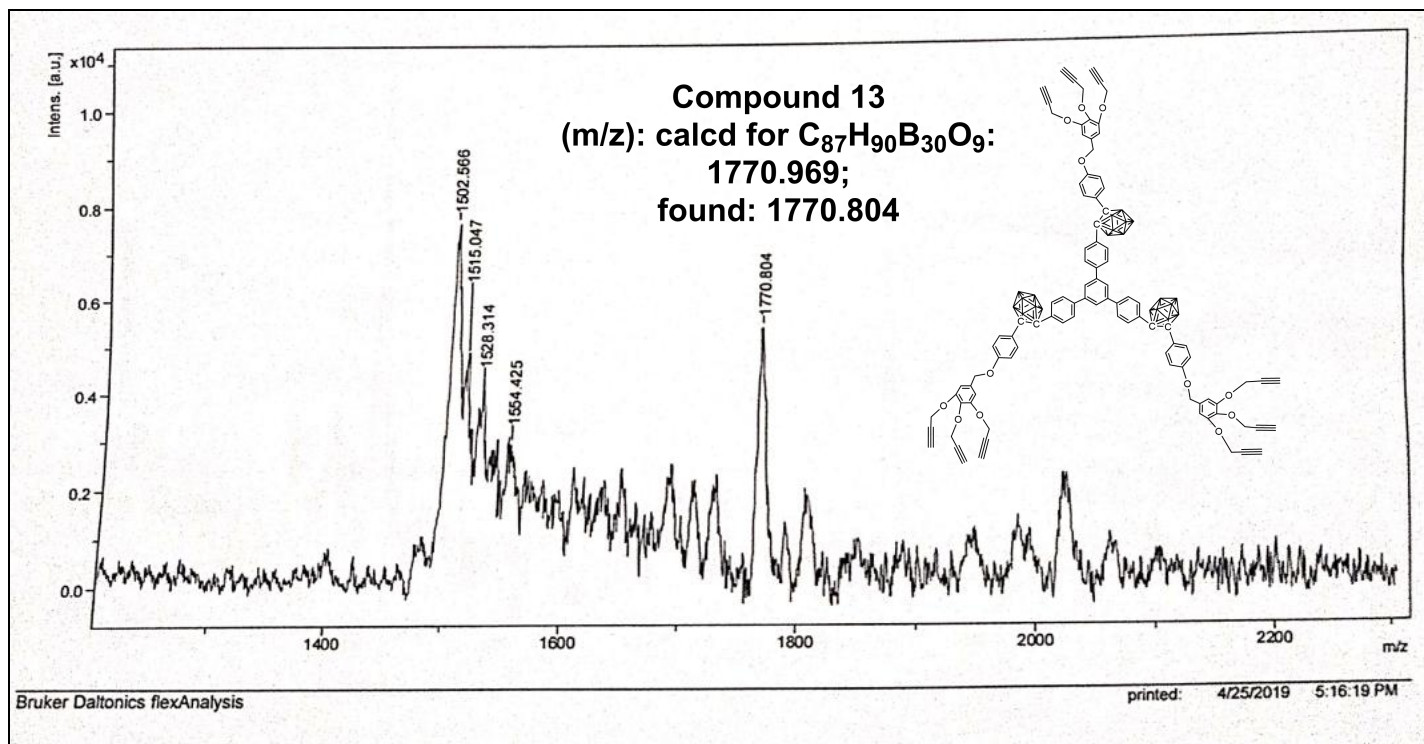

Figure S49: Mass spectra of compound 13

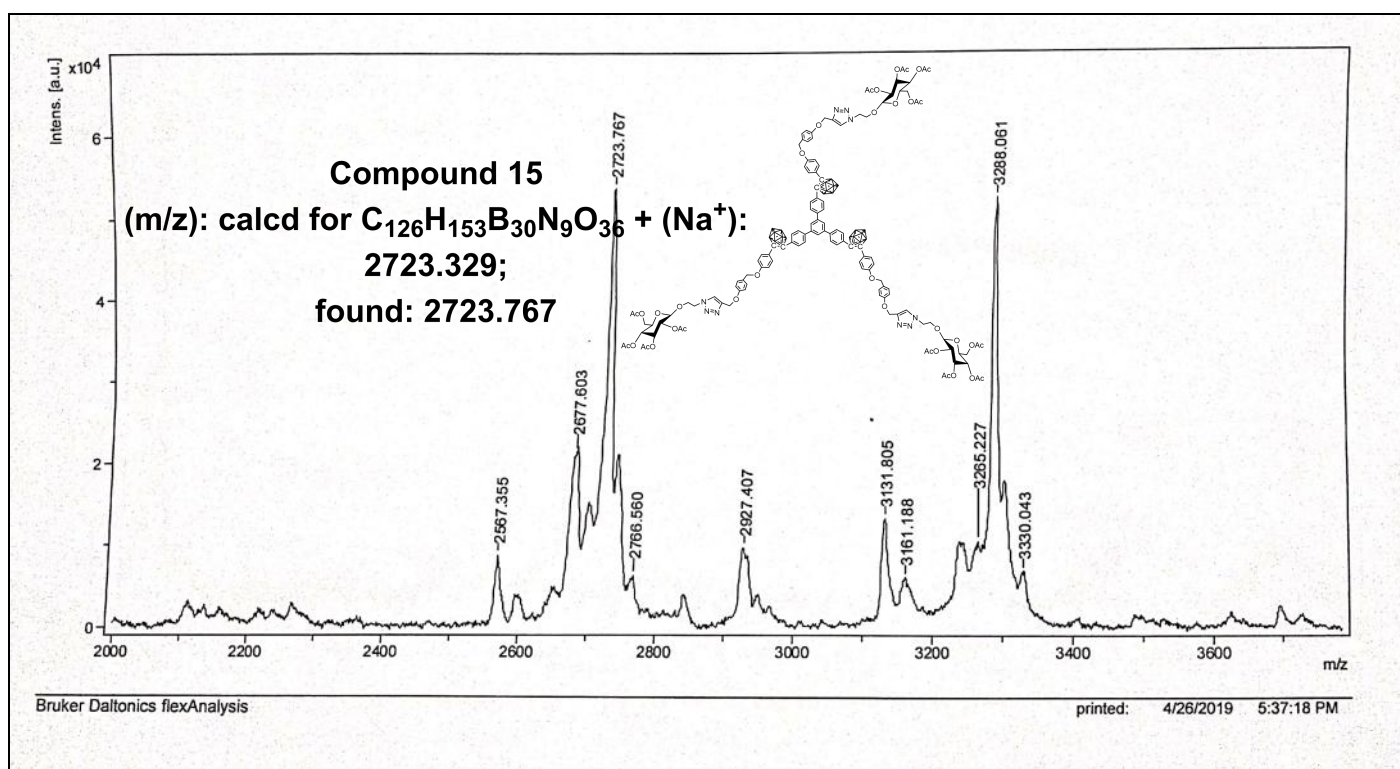

Figure S50: Mass spectra of compound 15

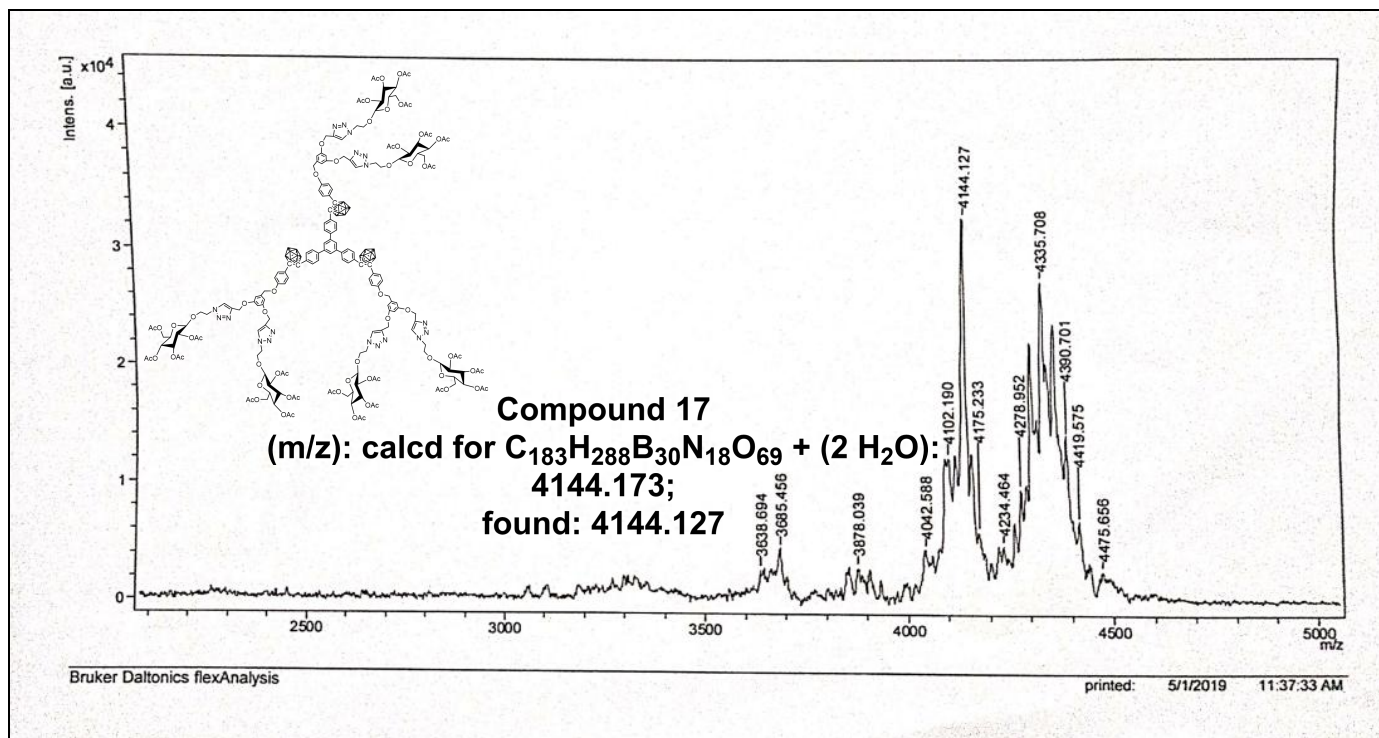

Figure S51: Mass spectra of compound 17

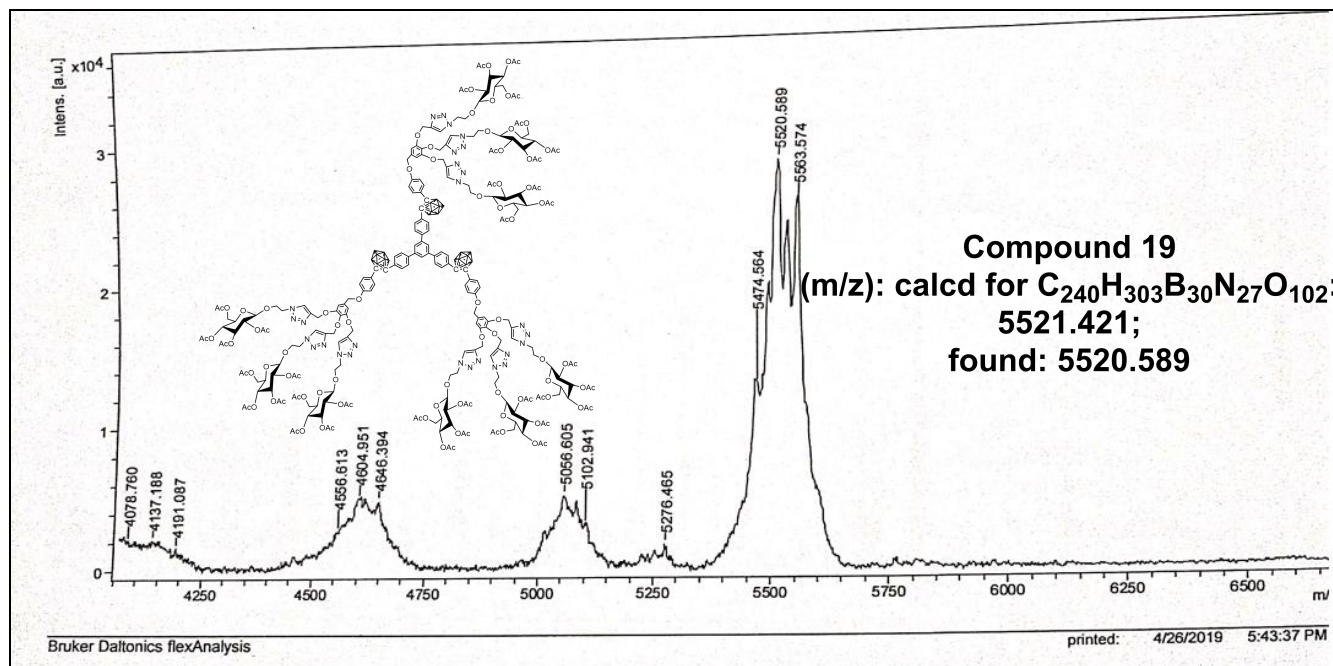

Figure S52: Mass spectra of compound 19

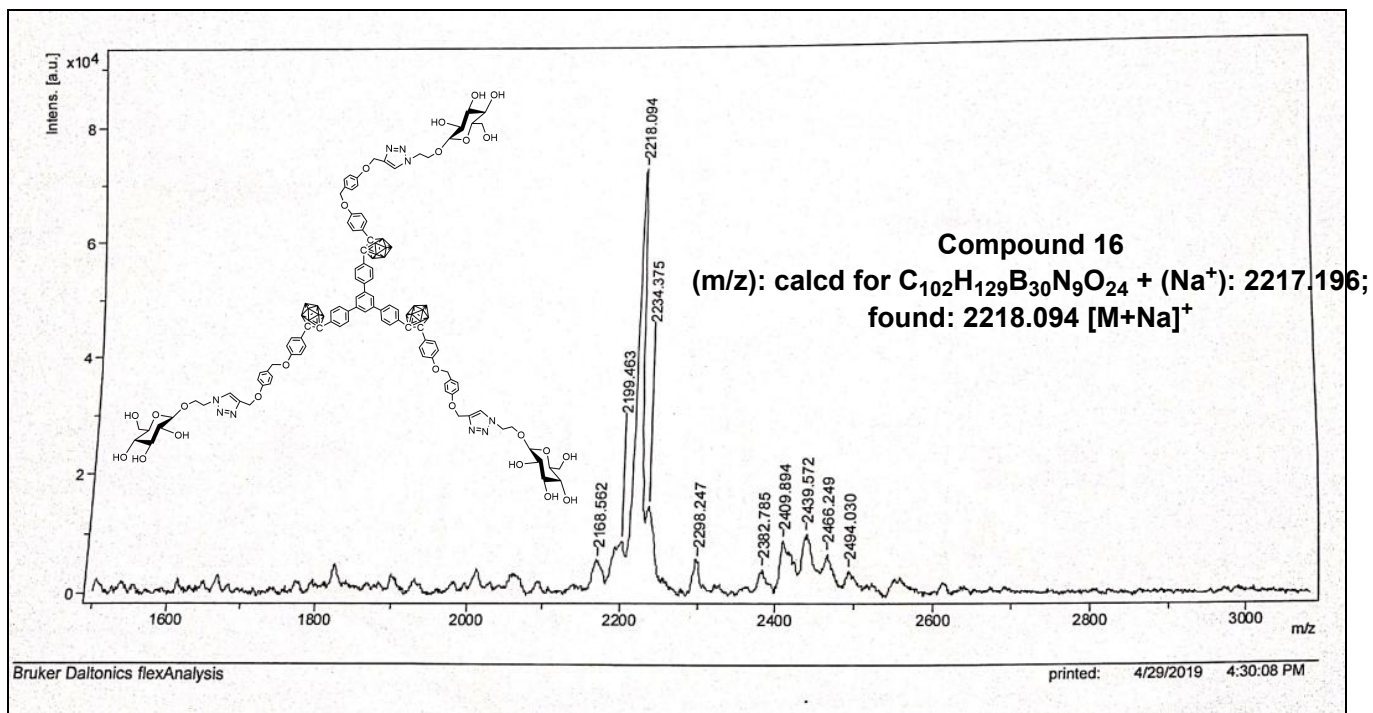

**Figure S53: Mass spectra of compound 16**

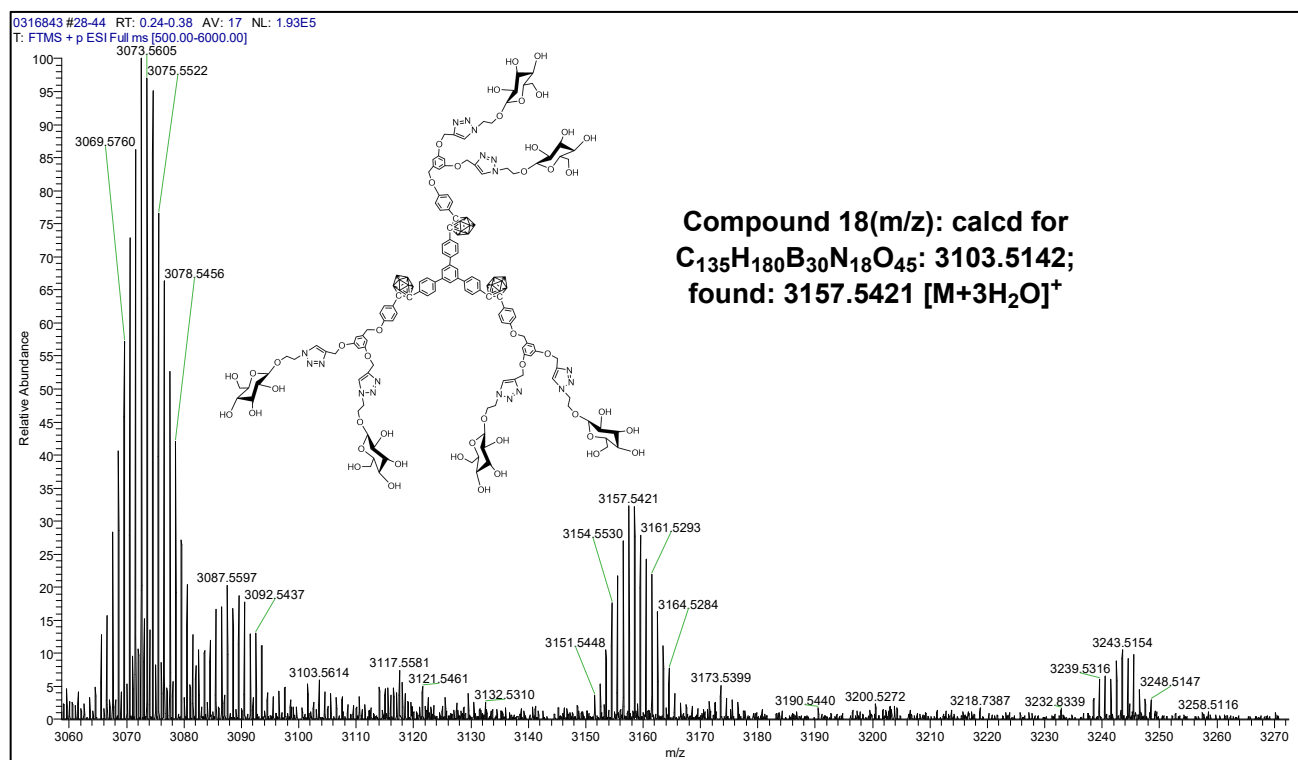

**Figure S54: Mass spectra of compound 18**

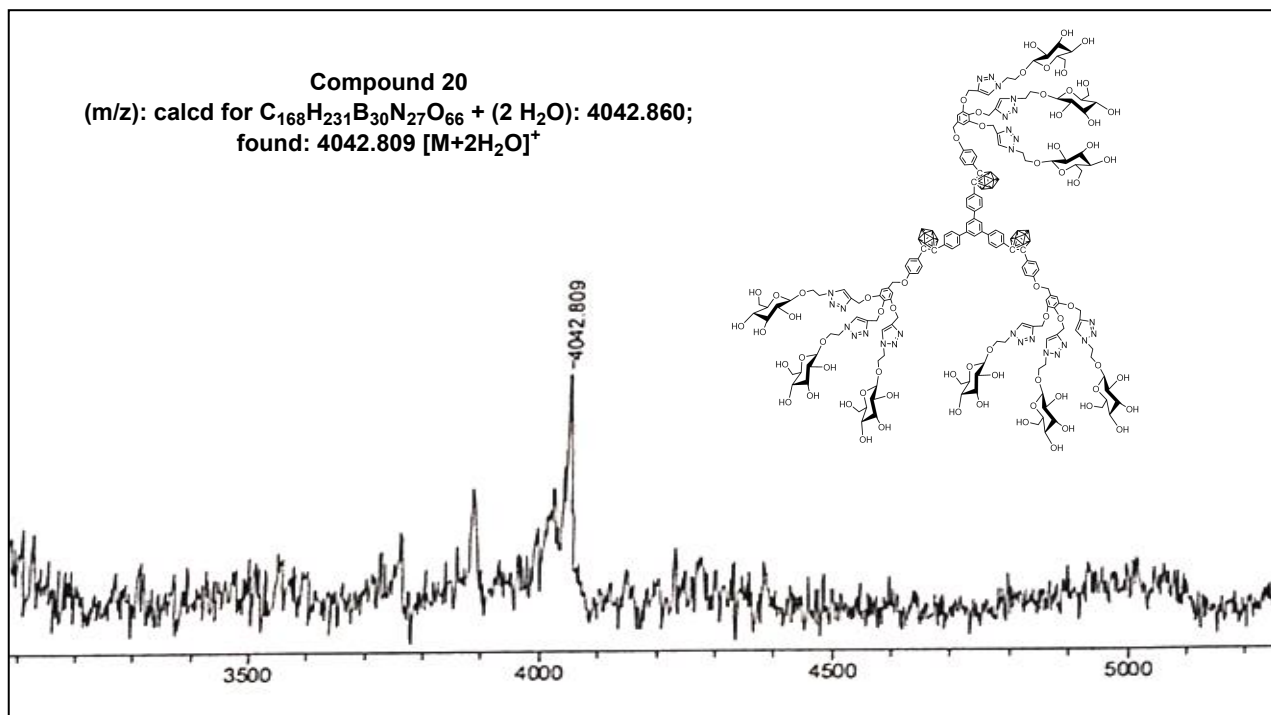

**Figure S55:** Mass spectra of compound 20
